# Supplementary material
Source: MDPI journal article supplement (https://www.mdpi.com/2073-4395/7/1/5)
Supplement: s1 [file s1]

Supplementary Materials: QTL Analysis for Drought Tolerance in Wheat: Present Status and Future Possibilities

Pushpendra Kumar Gupta, Harindra Singh Balyan and Vijay Gahlaut

**Table S1.** List of QTLs for different traits detected in wheat and its two related species (*T. tugidum* and *T*. *turgidum* ssp. *dicoccoides*) under drought.

| **S. No.** | **Trait/QTL/Chromosome** | **Linked Marker** | **Position (cM)** | **PVE** | **Phenotyping (Field/Green House/Pots)** | **Mapping Population (Type)** | **Reference** |
| --- | --- | --- | --- | --- | --- | --- | --- |
| **I.** | **Agronomic trait** |  |  |  |  |  |  |
| **a.** | **Grain yield** |  |  |  |  |  |  |
| 1. | *Qyld.csdh.7AL* | *wmc273.3* | 159 | N/A | Field | CS/SQ1 (DH) | [1] |
| 2. | *Qyld.aww.2A* | *cfd36* | 163 | N/A | Field | Drysdale/Gladius (RILs) | [2] |
| 3. | *Qyld.aww.2B.1* | *PpD1-B1* | 100 | N/A | Field | Drysdale/Gladius (RILs) | [2] |
| 4. | *Qyld.aww.2B.2* | *wPt-3132* | 220 | N/A | Field | Drysdale/Gladius (RILs) | [2] |
| 5. | *Qyld.aww.3A* | *barc324* | 229 | N/A | Field | Drysdale/Gladius (RILs) | [2] |
| 6. | *Qyld-4A* | *4A-act/cag-3* | 13.1 | 11.6 | Field | Seri M82/Babax (RILs) | [3] |
| 7. | *Qyld-7D* | *7D-acc/cat-10* | 2.73 | 9.9 | Field | Seri M82/Babax (RILs) | [3] |
| 8. | *4A* | *BE637912* | 80.3 | 15 | Field | Dharwar Dry/Sitta (RILs) | [4] |
| 9. | *4A* | *wmc89* | 84.9 | 18 | Field | Dharwar Dry/Sitta (RILs) | [4] |
| 10. | *4A* | *wmc420* | 90.4 | 20 | Field | Dharwar Dry/Sitta (RILs) | [4] |
| 11. | *1D* | *XCGAG383* | N/A | 12.7 | Field | Dharwar Dry/Sitta (RILs) | [5] |
| 12. | *Qdt.ksu-4A* | *XCCGA110* | 10 | 39.9 | Field | Dharwar Dry/Sitta (RILs) | [5] |
| 13. | *1B-a* | *wPt-2052* | 90.1 | 10.5 | Field | Seri/Babax (RILs) | [6] |
| 14. | *3B-b* | *wPt-1804* | 120 | 15.1 | Field | Seri/Babax (RILs) | [6] |
| 15. | *4A-a* | *gwm397* | 6 | 23.9 | Field | Seri/Babax (RILs) | [6] |
| 16. | *4A-b* | *wPt-7821* | 48.8 | 3.1 | Field | Seri/Babax (RILs) | [6] |
| 17. | *QYld-1B* | *wPt-3475* | 117.2 | 2.61 | Field | Excalibur/Kukri (DH) | [7] |
| 18. | *QYld-2B.1* | *wPt-1663* | 0 | 6.3 | Field | Excalibur/Kukri (DH) | [7] |
| 19. | *QYld-2B.2* | *wPt-0709* | 101.7 | 9.7 | Field | Excalibur/Kukri (DH) | [7] |
| 20. | *QYld-4A* | *wPt-2794* | 132.7 | 3.7 | Field | Excalibur/Kukri (DH) | [7] |
| 21. | *QYld-5B* | *wPt-9666* | 51.9 | 11.7 | Field | Excalibur/Kukri (DH) | [7] |
| 22. | *QYld.7A.1* | *gwm0060* | 80.1 | 11.9 | Field | Excalibur/Kukri (DH) | [7] |
| 23. | *QYld.7A.2* | *wmc0083* | 119.4 | 5.8 | Field | Excalibur/Kukri (DH) | [7] |
| 24. | *7A-a* | *wPt-3992* | 107.2 | 7.2 | Field | Seri/Babax (RILs) | [8] |
| 25. | *Qyld.aww-1A* | *wPt-0864* | 186.4 | 4 | Field | RAC875/Kukri (DH) | [9] |
| 26. | *Qyld.aww-1B* | *BARC0256* | 164.7 | 6 | Field | RAC875/Kukri (DH) | [9] |
| 27. | *Qyld.aww-1B* | *BARC0256* | 165.7 | 4 | Field | RAC875/Kukri (DH) | [9] |
| 28. | *Qyld.aww-2A* | *WPT-7285* | 94.5 | 3 | Field | RAC875/Kukri (DH) | [9] |
| 29. | *Qyld.aww-2B* | *WPT-0335* | 61.3 | 4 | Field | RAC875/Kukri (DH) | [9] |
| 30. | *Qyld.aww-2B* | *WPT-0335* | 63.3 | 6 | Field | RAC875/Kukri (DH) | [9] |
| 31. | *Qyld.aww-2D-1* | *PPD-D1* | 50.0 | 18 | Field | RAC875/Kukri (DH) | [9] |
| 32. | *Qyld.aww-2D* | *WPT-0330* | 66.4 | 8 | Field | RAC875/Kukri (DH) | [9] |
| 33. | *Qyld.aww-2D* | *BARC0328B* | 74.2 | 13 | Field | RAC875/Kukri (DH) | [9] |
| 34. | *Qyld.aww-2D-2* | *BARC0328B* | 78.2 | 18 | Field | RAC875/Kukri (DH) | [9] |
| 35. | *Qyld.aww-4D* | *WMC0457* | 8 | 6 | Field | RAC875/Kukri (DH) | [9] |
| 36. | *Qyld.aww-6D* | *BARC0301* | 84.1 | 4 | Field | RAC875/Kukri (DH) | [9] |
| 37. | *Qyld.aww-6D* | *GWM0325B* | 85.1 | 3 | Field | RAC875/Kukri (DH) | [9] |
| 38. | *Qyld.aww-7A-1* | *BARC0108* | 116.6 | 11 | Field | RAC875/Kukri (DH) | [9] |
| 39. | *Qyld.aww-7A-1* | *BARC0108* | 117.6 | 12 | Field | RAC875/Kukri (DH) | [9] |
| 40. | *Qyld.aww-7A-2* | *BARC0292* | 164.9 | 4 | Field | RAC875/Kukri (DH) | [9] |
| 41. | *Q.yld.aww-3A* | *GWM0002* | 56.9 | 3 | Field | RAC875/Kukri (DH) | [10] |
| 42. | *Q.yld.aww-3B-2* | *WPT-8021* | 192.7 | 12 | Field | RAC875/Kukri (DH) | [10] |
| 43. | *Q.yld.aww-3D* | *CFD0034* | 64.9 | 4 | Field | RAC875/Kukri (DH) | [10] |
| 44. | *Q.yld.aww-7A-2* | *BARC1004* | 109.4 | 6 | Field | RAC875/Kukri (DH) | [10] |
| 45. | *qGY.2D.1* | *cfd36* | 87.5 | 16 | PVC pipes | WL711/C306 (RILs) | [11] |
| 46. | *qGY.3D.1* | *cfd55* | 5 | 13 | PVC pipes | WL711/C306 (RILs) | [11] |
| 47. | *qGY.4B.1* | *barc20* | 8 | 6 | PVC pipes | WL711/C306 (RILs) | [11] |
| 48. | *qGY.5A.1* | *gwm304* | 99.6 | 6 | PVC pipes | WL711/C306 (RILs) | [11] |
| 49. | *qGYWD.3B.1* | *cfp56* | 87.8 | 18.7 | Field | WL711/C306 (RILs) | [12] |
| 50. | *qGYWD.3B.2* | *gpw7774* | 97.6 | 19.6 | Field | WL711/C306 (RILs) | [12] |
| 51. | *qGYWD.3B.3* | *gwm389* | 125.5 | 21.8 | Field | WL711/C306 (RILs) | [12] |
| 52. | *qGYWD.3D.2* | *wmc443* | 126.5 | 5.8 | Field | WL711/C306 (RILs) | [12] |
| 53. | *qGYWD.4A.1* | *wmc313* | 168.7 | 7.1 | Field | WL711/C306 (RILs) | [12] |
| 54. | *qGYWD.7B.1* | *caps149* | 246 | 12.5 | Field | WL711/C306 (RILs) | [12] |
| 55. | *QGY.cgb-1B* | *cwm547* | 52.11 | 7.86 | Field | Hanxuan 10 /Lumai 14 (DH) | [13] |
| 56. | *QGY.cgb-4B* | *gwm149* | 85.91 | 13.12 | Field | Hanxuan 10 /Lumai 14 (DH) | [13] |
| 57. | *QGY.cgb-6B* | *wmc269.3* | 134.6 | 13.77 | Field | Hanxuan 10 /Lumai 14 (DH) | [13] |
| 58. | *4B* | *gwm375* | 23 | NR | Field | SeriM82/Babax (RIL) | [14] |
| 59. | *5A* | *barc40* | 61 | NR | Field | SeriM82/Babax (RIL) | [14] |
| 60. | *5B* | *gwm133* | 57 | NR | Field | SeriM82/Babax (RIL) | [14] |
| 61. | *6B* | *gwm518* | 27 | NR | Field | SeriM82/Babax (RIL) | [14] |
| 62. | *6B* | *gwm132* | 67.1 | NR | Field | SeriM82/Babax (RIL) | [14] |
| 63. | *6D* | *gdm132* | 20 | NR | Field | SeriM82/Babax (RIL) | [14] |
| 64. | *1B* | *gwm413* | 26 | NR | Field | SeriM82/Babax (RIL) | [14] |
| 65. | *1D* | *barc169* | 53.6 | NR | Field | SeriM82/Babax (RIL) | [14] |
| 66. | *1D* | *gwm301* | 0 | NR | Field | SeriM82/Babax (RIL) | [14] |
| 67. | *7A* | *barc121* | 37 | NR | Field | SeriM82/Babax (RIL) | [14] |
| 68. | *7B* | *gdm86* | 0 | NR | Field | SeriM82/Babax (RIL) | [14] |
| 69. | *QYld.idw-2B* | *gwm1027* | 155 | 15.6 | Field | Kofa/Svevo (RIL;Durum) | [15] |
| 70. | *QYld.idw-3B* | *barc133* | 8 | 15.3 | Field | Kofa/Svevo (RIL;Durum) | [15] |
| 71. | *QYld.idw-7B* | *gwm569* | 0 | 4.1 | Field | Kofa/Svevo (RIL;Durum) | [15] |
| 72. | *2B* | *gwm374* | 49 | 13.1 | Greenhouse | Langdon/G18-16 (RIL; Durum) | [16] |
| 73. | *2B* | *gwm1249* | 66 | 13.1 | Greenhouse | Langdon/G18-16 (RIL; Durum) | [16] |
| 74. | *4A* | *wmc262* | 37 | 4.2 | Greenhouse | Langdon/G18-16 (RIL; Durum) | [16] |
| 75. | *4B* | *gwm857* | 20.976 | 5.9 | Greenhouse | Langdon/G18-16 (RIL; Durum) | [16] |
| 76. | *5A* | *gwm293* | 52 | 3.1 | Greenhouse | Langdon/G18-16 (RIL; Durum) | [16] |
| 77. | *7B* | *gwm263* | 20.769 | 12.7 | Greenhouse | Langdon/G18-16 (RIL; Durum) | [16] |
| 78. | *2B* | *gwm382* | 114 | N/A | Field | Beaver/Soissons (DH) | [17] |
| 79. | *2D* | *gwm311* | 100 | N/A | Field | Beaver/Soissons (DH) | [17] |
| 80. | *2D* | *gwm539* | 91 | N/A | Field | Beaver/Soissons (DH) | [17] |
| **b.** | **Thousand grain weight** |  |  |  |  |  |  |
| 1. | *QTgw.aww.2B* | *PpD1-B1* | 100 | N/A | Field | Drysdale/Gladius (RILs) | [2] |
| 2. | *QTgw.aww.2D.1* | *PpD1-D1* | 52 | N/A | Field | Drysdale/Gladius (RILs) | [2] |
| 3. | *QTgw.aww.2D.2* | *barc11* | 139 | N/A | Field | Drysdale/Gladius (RILs) | [2] |
| 4. | *QTgw.aww.4A* | *wPt-023* | 145 | N/A | Field | Drysdale/Gladius (RILs) | [2] |
| 5. | *QTgw-7D-b* | *C29P13* | 12.5 | 21.9 | Field | Seri M82/Babax (RILs) | [3] |
| 6. | *4A-b* | *act/cag-4* | 21.2 | 5.4 | Field | Seri/Babax (RILs) | [6] |
| 7. | *QTgw-2B* | *wPt-2106* | 8.8 | 8.5 | Field | Excalibur/Kukri (DH) | [7] |
| 8. | *QTgw-7A* | *wmc0283* | 81.2 | 24.7 | Field | Excalibur/Kukri (DH) | [7] |
| 9. | *1B-a* | *act/ctc-7* | 62 | 6.3 | Field | Seri/Babax (RILs) | [8] |
| 10. | *1D-a* | *wPt-7038* | 47 | 4.9 | Field | Seri/Babax (RILs) | [8] |
| 11. | *2B-a* | *agc/cag-4* | 37 | 5 | Field | Seri/Babax (RILs) | [8] |
| 12. | *4D-a* | *wmc048b* | 0 | 7.4 | Field | Seri/Babax (RILs) | [8] |
| 13. | *6A-a* | *wPt-7599* | 55 | 6.5 | Field | Seri/Babax (RILs) | [8] |
| 14. | *QTkw.aww-1D* | *CFD0027* | 115.8 | 3 | Field | RAC875/Kukri (DH) | [9] |
| 15. | *QTkw.aww-2-1* | *BARC0013A* | 53.7 | 14 | Field | RAC875/Kukri (DH) | [9] |
| 16. | *QTkw.aww-2B-2* | *CFD0050A* | 139.3 | 17 | Field | RAC875/Kukri (DH) | [9] |
| 17. | *QTkw.aww-3D* | *CFD0223B* | 136.8 | 2 | Field | RAC875/Kukri (DH) | [9] |
| 18. | *QTkw.aww-4A* | *WPT-5694* | 119.7 | 4 | Field | RAC875/Kukri (DH) | [9] |
| 19. | *QTkw.aww-5B* | *WPT-3457* | 97.9 | 7 | Field | RAC875/Kukri (DH) | [9] |
| 20. | *QTkw.aww-6A* | *WMC0256A* | 98.2 | 11 | Field | RAC875/Kukri (DH) | [9] |
| 21. | *QTkw.aww-6B* | *BARC0223* | 118.7 | 0.9 | Field | RAC875/Kukri (DH) | [9] |
| 22. | *QTkw.aww-7A* | *WPT-4744* | 131 | 7 | Field | RAC875/Kukri (DH) | [9] |
| 23. | *QTkw.aww-7D* | *GWM295* | 59.8 | 4 | Field | RAC875/Kukri (DH) | [9] |
| 24. | *Q.Tkw.aww-2B* | *BARC0091* | 52.7 | 8 | Field | RAC875/Kukri (DH) | [10] |
| 25. | *Q.Tkw.aww-2B* | *BARC0134* | 149.2 | 3 | Field | RAC875/Kukri (DH) | [10] |
| 26. | *Q.Tkw.aww-3A* | *GWM0002* | 56.9 | 13 | Field | RAC875/Kukri (DH) | [10] |
| 27. | *Q.Tkw.aww-5B* | *WPT-4936* | 83.1 | 13 | Field | RAC875/Kukri (DH) | [10] |
| 28. | *QTgw.ipk-7A-FS4* | *gwm0834* | 42 | 14.6 | Field | HTRI 11712/HTRI 105 (F2:3) | [18] |
| 29. | *QTgw.ipk-7D-FS4* | *gwm1002* | 76 | 8.9 | Field | HTRI 11712/HTRI 105 (F2:3) | [18] |
| 30. | *QTgw.ipk-4A-FS4* | *gwm0160* | 112 | 10.25 | Field | HTRI 11712/HTRI 105 (F2:3) | [18] |
| 31. | *QTgw.ipk-4A-FS4* | *barc327* | 128 | 11.9 | Field | HTRI 11712/HTRI 105 (F2:3) | [18] |
| 32. | *QTgw.ipk-1B-FS4* | *gwm0818* | 162 | 11.8 | Field | HTRI 11712/HTRI 105 (F2:3) | [18] |
| 33. | *QTgw.ipk-4B-FS5* | *gwm1084* | 36 | 9.2 | Field | HTRI 11712/HTRI 105 (F2:3) | [18] |
| 34. | *QTgw.ipk-7A-GS7* | *gwm0834* | 42 | 9.1 | Greenhouse | HTRI 11712/HTRI 105 (F2:3) | [18] |
| 35. | *QTgw.ipk-7D-GS7* | *gwm1220* | 68 | 12.7 | Greenhouse | HTRI 11712/HTRI 105 (F2:3) | [18] |
| 36. | *qTGWWD.1D.1* | *cfd61* | 3 | 10.4 | Field | WL711/C306 (RILs) | [12] |
| 37. | *qTGWWD.3B.1* | *cfp56* | 87.8 | 9.4 | Field | WL711/C306 (RILs) | [12] |
| 38. | *qTGWWD.3B.4* | *barc75* | 0 | 11.1 | Field | WL711/C306 (RILs) | [12] |
| 39. | *qTGWWD.3B.5* | *cfb3059* | 388 | 10.4 | Field | WL711/C306 (RILs) | [12] |
| 40. | *qTGWWD.7B.1* | *wmc517* | 164.8 | 9.3 | Field | WL711/C306 (RILs) | [12] |
| 41. | *QTGW.cgb-2D.2* | *wmc181* | 187.51 | 6.24 | Field | Hanxuan 10 /Lumai 14 (DH) | [13] |
| 42. | *QTGW.cgb-3D.3* | *gdm8* | 80.01 | 8.1 | Field | Hanxuan 10 /Lumai 14 (DH) | [13] |
| 43. | *QTGW.cgb-6A.1* | *psp3071* | 99.41 | 14.31 | Field | Hanxuan 10 /Lumai 14 (DH) | [13] |
| 44. | *QTGW.cgb-6A.2* | *wmc179.1* | 120.71 | 14.74 | Field | Hanxuan 10 /Lumai 14 (DH) | [13] |
| 45. | *QTgwg.cgb-2A.1* | *WMC27.2* | 16 | 5.19 | Feild | Hanxuan 10 /Lumai 14 (DH) | [19] |
| 46. | *QTgwg.cgb-4A.1* | *CWM145* | 18 | 2.45 | Feild | Hanxuan 10 /Lumai 14 (DH) | [19] |
| 47. | *QTgwg.cgb-5B* | *P4138-238* | 20 | 4.35 | Feild | Hanxuan 10 /Lumai 14 (DH) | [19] |
| 48. | *QTgwg.cgb-6A.1* | *WMC297* | 1 | 3.69 | Feild | Hanxuan 10 /Lumai 14 (DH) | [19] |
| 49. | *QTgwg.cgb-7A* | *P2071-180* | 0 | 1.7 | Feild | Hanxuan 10 /Lumai 14 (DH) | [19] |
| 50. | *QTgwm.cgb-2D.1* | *WMC41* | 20 | 5.48 | Feild | Hanxuan 10 /Lumai 14 (DH) | [19] |
| 51. | *QTgwm.cgb-3A.1* | *P3614-280* | 1 | 4.2 | Feild | Hanxuan 10 /Lumai 14 (DH) | [19] |
| 52. | *QTgwm.cgb-3A.2* | *WMC532* | 10 | 6.43 | Feild | Hanxuan 10 /Lumai 14 (DH) | [19] |
| 53. | *QTgwm.cgb-3A.3* | *gwm391* | 1 | 2.29 | Feild | Hanxuan 10 /Lumai 14 (DH) | [19] |
| 54. | *QTgwm.cgb-3B.1* | *P3622-400* | 6 | 2.97 | Feild | Hanxuan 10 /Lumai 14 (DH) | [19] |
| 55. | *QTgwm.cgb-6A.1* | *psp3071* | 8 | 1.77 | Feild | Hanxuan 10 /Lumai 14 (DH) | [19] |
| 56. | *QTgwm.cgb-6A.2* | *P3526-130* | 14 | 5.94 | Feild | Hanxuan 10 /Lumai 14 (DH) | [19] |
| 57. | *3B* | *barc101* | 86.1 | 45.19 | Field | Oste-Gata/Massara (RIL; Durum) | [20] |
| 58. | *7B* | *cfd22* | 10.1 | 11.77 | Field | Oste-Gata/Massara (RIL; Durum) | [20] |
| 59. | *3B* | *gwm389* | 26 | 10.89 | Field | Oste-Gata/Massara (RIL; Durum) | [20] |
| 60. | *7B* | *cfd22* | 0.1 | 5.6 | Field | Oste-Gata/Massara (RIL; Durum) | [20] |
| **c.** | **Test weight** |  |  |  |  |  |  |
| 1. | *QTwt.aww-1B* | *WPT-2052* | 7.9 | 7 | Field | RAC875/Kukri (DH) | [9] |
| 2. | *QTwt.aww-1B* | *WPT-2052* | 4.9 | 7 | Field | RAC875/Kukri (DH) | [9] |
| 3. | *QTwt.aww-1B* | *WPT-2052* | 4.9 | 6 | Field | RAC875/Kukri (DH) | [9] |
| 4. | *QTwt.aww-1D* | *WPT-1799* | 144.4 | 4 | Field | RAC875/Kukri (DH) | [9] |
| 5. | *QTwt.aww-2A* | *GWM0312* | 110.6 | 10 | Field | RAC875/Kukri (DH) | [9] |
| 6. | *QTwt.aww-2A* | *GWM0312* | 111.6 | 6 | Field | RAC875/Kukri (DH) | [9] |
| 7. | *QTwt.aww-2A* | *WMC0181B* | 128 | 5 | Field | RAC875/Kukri (DH) | [9] |
| 8. | *QTwt.aww-3A* | *BARC0328A* | 59.9 | 6 | Field | RAC875/Kukri (DH) | [9] |
| 9. | *QTwt.aww-3A* | *WMC0388A* | 62.6 | 7 | Field | RAC875/Kukri (DH) | [9] |
| 10. | *QTwt.aww-4A* | *WPT-7001* | 11.9 | 6 | Field | RAC875/Kukri (DH) | [9] |
| 11. | *QTwt.aww-4A* | *BARC0106* | 15.1 | 6 | Field | RAC875/Kukri (DH) | [9] |
| 12. | *QTwt.aww-4D* | *WMC0457* | 5.5 | 3 | Field | RAC875/Kukri (DH) | [9] |
| 13. | *QTwt.aww-6A* | *WMC0256A* | 82.2 | 4 | Field | RAC875/Kukri (DH) | [9] |
| **d.** | **Grains m−2** |  |  |  |  |  |  |
| 1. | *QGrn.aww.2B.1* | *wPt-2106* | 17 | N/A | Field | Drysdale/Gladius (RILs) | [2] |
| 2. | *QGrn.aww.3A* | *barc306* | 232 | N/A | Field | Drysdale/Gladius (RILs) | [2] |
| 3. | *QGrn.aww.5A* | *Vrn-A1* | 242 | N/A | Field | Drysdale/Gladius (RILs) | [2] |
| 4. | *QGrn-4A* | *C14P6* | 5.55 | 10.3 | Field | Seri M82/Babax (RILs) | [3] |
| 5. | *4A* | *wmc89* | 84.9 | 16 | Field | Dharwar Dry/Sitta (RILS) | [4] |
| 6. | *4A* | *wmc420* | 90.4 | 23 | Field | Dharwar Dry/Sitta (RILS) | [4] |
| 7. | *Qdt.ksu-4A* | *XCCGA110* | N/A | N/A | Field | Dharwar Dry/Sitta (RILs) | [5] |
| 8. | *QGm2-2B* | *wPt-2106* | 8.81 | 10 | Field | Excalibur/Kukri (DH) | [7] |
| 9. | *QGm2-4A* | *wPt-2983* | 124.4 | 4 | Field | Excalibur/Kukri (DH) | [7] |
| 10. | *QGm2-5B* | *wPt-9666* | 51.9 | 13.1 | Field | Excalibur/Kukri (DH) | [7] |
| 11. | *QGm2-6D* | *cfd0019c* | 85.8 | 4.4 | Field | Excalibur/Kukri (DH) | [7] |
| 12. | *QGm2-7A* | *gwm60* | 80.1 | 6.2 | Field | Excalibur/Kukri (DH) | [7] |
| 13. | *1B-a* | *acc/ctc-4* | 92 | 14.1 | Field | Seri/Babax (RILs) | [8] |
| 14. | *6A-a* | *wPt-7599* | 55 | 6.9 | Field | Seri/Babax (RILs) | [8] |
| 15. | 7A-a | *barc121* | 110 | 5.6 | Field | Seri/Babax (RILs) | [8] |
| 16. | *QKpsm.aww-1A* | *WPT-0864* | 182.4 | 11 | Field | RAC875/Kukri (DH) | [9] |
| 17. | *QKpsm.aww-1A* | *WPT-6568* | 198.8 | 8 | Field | RAC875/Kukri (DH) | [9] |
| 18. | *QKpsm.aww-2B* | *WPT-3378* | 134 | 3 | Field | RAC875/Kukri (DH) | [9] |
| 19. | *QKpsm.aww-2D-1* | *WPT-600* | 25.7 | 8 | Field | RAC875/Kukri (DH) | [9] |
| 20. | *QKpsm.aww-2D-2* | *BARC0328B* | 72.2 | 6 | Field | RAC875/Kukri (DH) | [9] |
| 21. | *QKpsm.aww-3A* | *BARC0328A* | 58.9 | 6 | Field | RAC875/Kukri (DH) | [9] |
| 22. | *QKpsm.aww-3B* | *CFA2226B* | 33 | 6 | Field | RAC875/Kukri (DH) | [9] |
| 23. | *QKpsm.aww-4D* | *BARC0288* | 6.3 | 7 | Field | RAC875/Kukri (DH) | [9] |
| 24. | *QKpsm.aww-6A* | *WMC0256A* | 92.2 | 4 | Field | RAC875/Kukri (DH) | [9] |
| 25. | *QKpsm.aww-6A* | *WMC0256A* | 97.2 | 7 | Field | RAC875/Kukri (DH) | [9] |
| 26. | *QKpsm.aww-6D* | *BARC0301* | 47.2 | 4 | Field | RAC875/Kukri (DH) | [9] |
| 27. | *QKpsm.aww-7A-1* | *CFA2028* | 90.2 | 5 | Field | RAC875/Kukri (DH) | [9] |
| 28. | *QKpsm.aww-7A-2* | *WPT-6013* | 169.7 | 5 | Field | RAC875/Kukri (DH) | [9] |
| 29. | *QKpsm.aww-7B* | *BARC0065* | 39.1 | 6 | Field | RAC875/Kukri (DH) | [9] |
| 30. | *QKpsm.aww-7B* | *BARC0137* | 41.6 | 8 | Field | RAC875/Kukri (DH) | [9] |
| 31. | *Q.Kpsm.aww-3D* | *CFD0034* | 64.9 | 11 | Field | RAC875/Kukri (DH) | [10] |
| 32. | *Q.Kpsm.aww-5B* | *WPT3457* | 83.9 | 6 | Field | RAC875/Kukri (DH) | [10] |
| 33. | *qGNWD.2D.1* | *wmc503* | 13.4 | 14.2 | Field | WL711/C306 (RILs) | [12] |
| 34. | *qGNWD.3B.1* | *cfp56* | 87.8 | 10.9 | Field | WL711/C306 (RILs) | [12] |
| 35. | *qGNWD.3B.2* | *gpw7774* | 97.6 | 21.4 | Field | WL711/C306 (RILs) | [12] |
| 36. | *qGNWD.4B.1* | *gwm495* | 138.1 | 10.5 | Field | WL711/C306 (RILs) | [12] |
| **e.** | **Grain width** |  |  |  |  |  |  |
| 1. | *QGwi.aww.2B* | *PpD1-B1* | 100 | N/A | Field | Drysdale/Gladius (RILs) | [2] |
| 2. | *QGwi.aww.6A* | *TaGW2* | 0 | N/A | Field | Drysdale/Gladius (RILs) | [2] |
| **f.** | **Days to Heading** |  |  |  |  |  |  |
| 1. | *QDh-7D.b* | *C29-P13* | 12.5 | 22.7 | Field | Seri M82/Babax (RILs) | [3] |
| 2. | *1D* | *XCGAG383* | N/A | 12.7 | Field | Dharwar Dry/Sitta (RILs) | [5] |
| 3. | *QTth-2B* | *wPt6199* | 84.8 | 5.7 | Field | Excalibur/Kukri (DH) | [7] |
| 4. | *QTth-5A* | *wmc75* | 130.4 | 12.1 | Field | Excalibur/Kukri (DH) | [7] |
| 5. | *QTth-7A* | *wmc283* | 81.2 | 33.99 | Field | Excalibur/Kukri (DH) | [7] |
| 6. | *1B* | *gwm413* | 26 | NR | Field | SeriM82/Babax (RIL) | [14] |
| 7. | *1D* | *gwm301* | 0 | NR | Field | SeriM82/Babax (RIL) | [14] |
| 8. | *5A* | *barc40* | 61 | NR | Field | SeriM82/Babax (RIL) | [14] |
| 9. | *7A* | *barc121* | 37 | NR | Field | SeriM82/Babax (RIL) | [14] |
| 10. | *7B* | *gdm86* | 88.671 | NR | Field | SeriM82/Babax (RIL) | [14] |
| 11. | *2B* | *gwm388* | 64.528 | NR | Field | SeriM82/Babax (RIL) | [14] |
| 12. | *QHd.idw-2A.2* | *wmc177* | 46 | 32.2 | Field | Kofa/Svevo (RIL;Durum) | [15] |
| 13. | *QHd.idw-2B.2* | *gwm1300* | 95 | 9.2 | Field | Kofa/Svevo (RIL;Durum) | [15] |
| 14. | *QHd.idw-7B* | *barc1005* | 25 | 17.8 | Field | Kofa/Svevo (RIL;Durum) | [15] |
| 15. | *1B* | *gwm752a* | 26 | 3 | Greenhouse | Langdon/G18-16 (RIL; Durum) | [16] |
| 16. | *2B* | *gwm1249* | 66 | 23.7 | Greenhouse | Langdon/G18-16 (RIL; Durum) | [16] |
| 17. | *4B* | *gwm781* | 27 | 2.4 | Greenhouse | Langdon/G18-16 (RIL; Durum) | [16] |
| 18. | *5A* | *gwm126* | 79 | 7.5 | Greenhouse | Langdon/G18-16 (RIL; Durum) | [16] |
| 19. | *5A* | *gwm293* | 52 | 7.5 | Greenhouse | Langdon/G18-16 (RIL; Durum) | [16] |
| 20. | *7B* | *gwm263* | 20.769 | 42.4 | Greenhouse | Langdon/G18-16 (RIL; Durum) | [16] |
| **g.** | **Days to Anthesis** |  |  |  |  |  |  |
| 1. | *qDTF.2D.1* | *cfd43* | 58.1 | 5.21 | PVC pipes | C306/WL711 (RILs) | [11] |
| 2. | *qDTFWD.2D.1* | *barc168* | 55.3 | 11.4 | Field | WL711/C306 (RILs) | [12] |
| 3. | *qDTFWD.3B.1* | *cfp56* | 87.8 | 7.2 | Field | WL711/C306 (RILs) | [12] |
| **h.** | **Days to Maturity** |  |  |  |  |  |  |
| 1. | *QDm-7D.b* | *7D-acc/cat-10* | 2.7 | 22.7 | Field | Seri M82/Babax (RILs) | [3] |
| 2. | *3A* | *barc321* | N/A | 8.2 | Field | Dharwar Dry/Sitta (RILs) | [5] |
| 3. | *1A-b* | *wPt-0432* | 0.01 | 4.9 | Field | Seri/Babax (RILs) | [6] |
| 4. | *5A-a* | *acc/ctg-7* | 46.5 | 7.8 | Field | Seri/Babax (RILs) | [6] |
| 5. | 1B | *gwm752a* | 26 | 4.6 | Greenhouse | Langdon/G18-16 (RIL; Durum) | [16] |
| 6. | 2B | *gwm1249* | 66 | 23.6 | Greenhouse | Langdon/G18-16 (RIL; Durum) | [16]) |
| 7. | 4A | *wmc262* | 37 | 1.7 | Greenhouse | Langdon/G18-16 (RIL; Durum) | [16] |
| 8. | 4B | *gwm251* | 27 | 3.7 | Greenhouse | Langdon/G18-16 (RIL; Durum) | [16] |
| 9. | 5A | *gwm156* | 72 | 4.6 | Greenhouse | Langdon/G18-16 (RIL; Durum) | [16] |
| 10. | 5B | *gwm408* | 109.88 | 5.8 | Greenhouse | Langdon/G18-16 (RIL; Durum) | [16] |
| 11. | 7A | *gwm332* | 90.75 | 3.9 | Greenhouse | Langdon/G18-16 (RIL; Durum) | [16] |
| 12. | 7B | *gwm263* | 20.769 | 30.1 | Greenhouse | Langdon/G18-16 (RIL; Durum) | [16] |
| **i.** | **Culm length** |  |  |  |  |  |  |
| 1. | 2B | *gwm410* | 41.528 | 17.4 | Greenhouse | Langdon/G18-16 (RIL; Durum) | [16] |
| 2. | 3B | *gwm77* | 63 | 5.8 | Greenhouse | Langdon/G18-16 (RIL; Durum) | [16] |
| 3. | 4A | *gwm695* | 4.8788 | 7.8 | Greenhouse | Langdon/G18-16 (RIL; Durum) | [16] |
| 4. | 4B | *gwm251* | 36 | 4.1 | Greenhouse | Langdon/G18-16 (RIL; Durum) | [16] |
| 5. | 6B | *gwm771* | 38 | 8.9 | Greenhouse | Langdon/G18-16 (RIL; Durum) | [16] |
| 6. | 7A | *gwm1083* | 90.75 | 4.8 | Greenhouse | Langdon/G18-16 (RIL; Durum) | [16] |
| 7. | 7B | *gwm263* | 20.769 | 9.9 | Greenhouse | Langdon/G18-16 (RIL; Durum) | [16] |
| **j.** | **Spike weight** |  |  |  |  |  |  |
| 1. | 1B | *gwm11* | 12.1 | 8.63 | Field | Oste-Gata/Massara (RIL; Durum) | [20] |
| **k.** | **Harvest index** |  |  |  |  |  |  |
| 1. | 2B | *barc124* | 37.1 | 7.96 | Field | Oste-Gata/Massara (RIL; Durum) | [20] |
| 2. | 5B | *gwm408* | 2.1 | 7.92 | Field | Oste-Gata/Massara (RIL; Durum) | [20] |
| 3. | 2B | *barc124* | 27.1 | 11.48 | Field | Oste-Gata/Massara (RIL; Durum) | [20] |
| 4. | 2B | *barc45* | 6.1 | 6.76 | Field | Oste-Gata/Massara (RIL; Durum) | [20] |
| 5. | 1B | *gwm752a* | 26 | 4.8 | Greenhouse | Langdon/G18-16 (RIL; Durum) | [16] |
| 6. | 2A | *gwm372* | 52 | 4.7 | Greenhouse | Langdon/G18-16 (RIL; Durum) | [16] |
| 7. | 2B | *gwm1249* | 66 | 12.8 | Greenhouse | Langdon/G18-16 (RIL; Durum) | [16] |
| 8. | 2B | *gwm410* | 41.528 | 12.8 | Greenhouse | Langdon/G18-16 (RIL; Durum) | [16] |
| 9. | 3B | *gwm685* | 12 | 6.9 | Greenhouse | Langdon/G18-16 (RIL; Durum) | [16] |
| 10. | 4A | *gwm637* | 29.879 | 1.7 | Greenhouse | Langdon/G18-16 (RIL; Durum) | [16] |
| 11. | 5A | *gwm293* | 52 | 5 | Greenhouse | Langdon/G18-16 (RIL; Durum) | [16] |
| 12. | 6A | *gwm786* | N/A | 3 | Greenhouse | Langdon/G18-16 (RIL; Durum) | [16] |
| 13. | 6B | *gwm518* | 0 | 4.8 | Greenhouse | Langdon/G18-16 (RIL; Durum) | [16] |
| 14. | 7B | *gwm263* | 20.769 | 22.4 | Greenhouse | Langdon/G18-16 (RIL; Durum) | [16] |
| **l.** | **Grain number per spike** |  |  |  |  |  |  |
| 1. | 2B | *barc124* | 19.1 | 12.7 | Field | Oste-Gata/Massara (RIL; Durum) | [20] |
| 2. | 2B | *barc45* | 10.1 | 7.4 | Field | Oste-Gata/Massara (RIL; Durum) | [20] |
| **m.** | **Grain weight per spike** |  |  |  |  |  |  |
| 1. | 5B | *gwm408* | 0.1 | 6.47 | Field | Oste-Gata/Massara (RIL; Durum) | [20] |
| **n.** | **Spike harvest index** |  |  |  |  |  |  |
| 1. | 3B | *gwm547* | 148.8 | 10.11 | Field | Oste-Gata/Massara (RIL; Durum) | [20] |
| **o.** | **Spike dry matter** |  |  |  |  |  |  |
| 1. | 2A | *gwm445* | 48.85 | 6.6 | Greenhouse | Langdon/G18-16 (RIL; Durum) | [16] |
| 2. | 4A | *wmc262* | 53.879 | 19.1 | Greenhouse | Langdon/G18-16 (RIL; Durum) | [16] |
| 3. | 4A | *wmc262* | 53.879 | 19.1 | Greenhouse | Langdon/G18-16 (RIL; Durum) | [16] |
| 4. | 7A | *gwm60* | 20.75 | 7.3 | Greenhouse | Langdon/G18-16 (RIL; Durum) | [16] |
| 5. | 7B | *gwm263* | 20.769 | 12.5 | Greenhouse | Langdon/G18-16 (RIL; Durum) | [16] |
| **p.** | **Total dry matter** |  |  |  |  |  |  |
| 1. | 4B | *gwm3072* | 20.976 | 11 | Greenhouse | Langdon/G18-16 (RIL; Durum) | [16] |
| 2. | 5A | *gwm293* | 34 | 13 | Greenhouse | Langdon/G18-16 (RIL; Durum) | [16] |
| 3. | 7A | *gwm871* | 20.75 | 9 | Greenhouse | Langdon/G18-16 (RIL; Durum) | [16] |
| **q.** | **Spike/m2** |  |  |  |  |  |  |
| 1. | 2B | *barc45* | 4.1 | 9.1 | Field | Oste-Gata/Massara (RIL; Durum) | [20] |
| II. | **Physiological traits** |  |  |  |  |  |  |
| **a.** | **Stem Reserve Mobilization** |  |  |  |  |  |  |
| 1. | *QSrm.ipk-2D* | *gwm249a* | 142 | 42.2 | Field | W7984/Opata85 (RIL) | [21] |
| 2. | *QSrm.ipk-5D* | *fbb238b* | 19 | 37.5 | Field | W7984/Opata85 (RIL) | [21] |
| 3. | *QSrm.ipk-7D* | *fbb189b* | 338 | 21 | Field | W7984/Opata85 (RIL) | [21] |
| **b.** | **Coleoptile length** |  |  |  |  |  |  |
| 1. | *QCL.WY.1A* | *wes226.2* | 28 | 11.76 | Filterpaper/gwrothchamber | Weimai8/Yannong19 (RIL) | [22] |
| 2. | *QCL.WY.2B* | *gwm547* | 120 | 10.1 | Filterpaper/gwrothchamber | Weimai8/Yannong19 (RIL) | [22] |
| 3. | *QCL.WY.5D.1* | *gdm99.2* | 223 | 5.4 | Filterpaper/gwrothchamber | Weimai8/Yannong19 (RIL) | [22] |
| 4. | *QCL.WY.5D.2* | *cfd266* | 238 | 6.8 | Filterpaper/gwrothchamber | Weimai8/Yannong19 (RIL) | [22] |
| 5. | *QCL.WL-2B* | *cfe140* | 176 | 7.1 | Filterpaper/gwrothchamber | Weimai8/Luohan2 (RIL) | [22] |
| 6. | *QCL.WL-3B.2* | *mag3356* | 153 | 11.4 | Filterpaper/gwrothchamber | Weimai8/Luohan2 (RIL) | [22] |
| 7. | *QCL.WL-4D.2* | *Ksum195* | 9 | 8 | Filterpaper/gwrothchamber | Weimai8/Luohan2 (RIL) | [22] |
| 8. | *6AS* | *NW3106* | 7.2 | 8 | Trays in Glasshouse | Chuan-Mai18/Vigour18 (RIL) | [23] |
| 9. | *3AS* | *NW1574* | 31.2 | 4 | Trays in Glasshouse | Chuan-Mai18/Vigour18 (RIL) | [23] |
| 10. | *1AS* | *wsnp_Ex_c3253_5995011* | 106.9 | N/A | Trays in Glasshouse | MAGIC population | [24] |
| 11. | *1BS* | *wsnp_Ku_c207_407862* | 66.2 | N/A | Trays in Glasshouse | MAGIC population | [24] |
| 12. | *1BL* | *wsnp_CAP11_c2596_1325540* | 133.9 | N/A | Trays in Glasshouse | MAGIC population | [24] |
| 13. | *2BS* | *wsnp_Ex_c14760_22866930* | 102.2 | N/A | Trays in Glasshouse | MAGIC population | [24] |
| 14. | *2DL* | *wsnp_Ra_c17636_26538543* | 249.1 | N/A | Trays in Glasshouse | MAGIC population | [24] |
| 15. | *3AS* | *wsnp_Ku_c38911_47455924* | 60.2 | N/A | Trays in Glasshouse | MAGIC population | [24] |
| 16. | *3D2* | *wsnp_Ra_c17636_26538543* | 19.8 | N/A | Trays in Glasshouse | MAGIC population | [24] |
| 17. | *4AS* | *wsnp_Ex_c13615_21393511* | 78.6 | N/A | Trays in Glasshouse | MAGIC population | [24] |
| 18. | *4BS* | *wsnp_Ex_c14026_21924297* | 47.9 | N/A | Trays in Glasshouse | MAGIC population | [24] |
| 19. | *4DS* | *Rht-D1* | 9.8 | N/A | Trays in Glasshouse | MAGIC population | [24] |
| 20. | *4DS* | *wsnp_Ex_c683_1341113* | 27.7 | N/A | Trays in Glasshouse | MAGIC population | [24] |
| 21. | *5BL* | *wsnp_Ku_c12562_20256747* | 132.6 | N/A | Trays in Glasshouse | MAGIC population | [24] |
| 22. | *5BL* | *wsnp_Ex_c214_421541* | 191.1 | N/A | Trays in Glasshouse | MAGIC population | [24] |
| 23. | *5DS* | *wsnp_Ku_c55961_59662821* | 8.2 | N/A | Trays in Glasshouse | MAGIC population | [24] |
| 24. | *6AS* | *wsnp_RFL_Contig2182_1514692* | 89.7 | N/A | Trays in Glasshouse | MAGIC population | [24] |
| 25. | *6BL* | *wsnp_Ex_rep_c70767_69655253* | 143.7 | N/A | Trays in Glasshouse | MAGIC population | [24] |
| 26. | *7AS* | *wsnp_Ex_c61603_61581218* | 28 | N/A | Trays in Glasshouse | MAGIC population | [24] |
| 27. | *1DL* | *wsnp_Ex_c8188_13842273* | 189.4 | N/A | Trays in Glasshouse | MAGIC population | [24] |
| 28. | *2DS* | *wsnp_CAP7_c2782_1329707* | 68.7 | N/A | Trays in Glasshouse | MAGIC population | [24] |
| 29. | *3AL* | *wsnp_Ex_rep_c102478_87635370* | 108.6 | N/A | Trays in Glasshouse | MAGIC population | [24] |
| 30. | *3BL* | *wsnp_Ex_rep_c66380_64573939* | 192.3 | N/A | Trays in Glasshouse | MAGIC population | [24] |
| 31. | *7AL* | *wsnp_Ex_c42653_49180485* | 132.2 | N/A | Trays in Glasshouse | MAGIC population | [24] |
| 32. | *7AL* | *wsnp_Ex_c43009_49439922* | 194.9 | N/A | Trays in Glasshouse | MAGIC population | [24] |
| 33. | *7BS* | *wsnp_Ex_c323_629581* | 34.5 | N/A | Trays in Glasshouse | MAGIC population | [24] |
| 34. | *4BS* | *csME1* | 46 | 45 | Trays in Growth cabinet | Cranbrook/Halberd (DH) | [25] |
| 35. | *4BL* | *ksuC2* | 52 | 23 | Trays in Growth cabinet | Cranbrook/Halberd (DH) | [25] |
| 36. | *5AL* | *p31/m58-2* | 71 | 13 | Trays in Growth cabinet | Cranbrook/Halberd (DH) | [25] |
| 37. | *1AS* | *ksuG9c* | 54.6 | 3.6 | Trays in Growth cabinet | Cranbrook/Halberd (DH) | [26] |
| 38. | *2BS* | *wPt-0615* | 59.5 | 2.7 | Trays in Growth cabinet | Cranbrook/Halberd (DH) | [26] |
| 39. | *2DS* | *Stm55ltgag* | 124.2 | 5.9 | Trays in Growth cabinet | Cranbrook/Halberd (DH) | [26] |
| 40. | *3BS* | *wPt-8855* | 13.3 | 2.8 | Trays in Growth cabinet | Cranbrook/Halberd (DH) | [26] |
| 41. | *4BS* | *Rht-B1b* | 54.4 | 35.4 | Trays in Growth cabinet | Cranbrook/Halberd (DH) | [26] |
| 42. | *5AL* | *psr426* | 129 | 8.6 | Trays in Growth cabinet | Cranbrook/Halberd (DH) | [26] |
| 43. | *5DS* | *psr326b* | 69 | 4.1 | Trays in Growth cabinet | Cranbrook/Halberd (DH) | [26] |
| 44. | *2BS* | *wmc474* | 46.4 | 2.8 | Trays in Growth cabinet | Sunco/Tasman (DH) | [26] |
| 45. | *2DS* | *gwm515c* | 58.4 | 1.2 | Trays in Growth cabinet | Sunco/Tasman (DH) | [26] |
| 46. | *4AS* | *gwm165* | 0 | 2.3 | Trays in Growth cabinet | Sunco/Tasman (DH) | [26] |
| 47. | *4BS* | *Rht-B1b* | 13.7 | 20.6 | Trays in Growth cabinet | Sunco/Tasman (DH) | [26] |
| 48. | *4DS* | *Rht-D1b* | 1.8 | 29 | Trays in Growth cabinet | Sunco/Tasman (DH) | [26] |
| 49. | *6BL* | *barc178* | 31 | 2.2 | Trays in Growth cabinet | Sunco/Tasman (DH) | [26] |
| 50. | *2DS* | *P36/M43-1* | 77.3 | 3.8 | Trays in Growth cabinet | CD87/Katepwa (DH) | [26] |
| 51. | *3BS* | *abg75c* | 122.8 | 3.6 | Trays in Growth cabinet | CD87/Katepwa (DH) | [26] |
| 52. | *4BS* | *Rht-B1b* | 52 | 28.2 | Trays in Growth cabinet | CD87/Katepwa (DH) | [26] |
| 53. | *5DS* | *abg3a* | 83.1 | 2.8 | Trays in Growth cabinet | CD87/Katepwa (DH) | [26] |
| 54. | *6BL* | *P35/M39-9* | 32.2 | 4.1 | Trays in Growth cabinet | CD87/Katepwa (DH) | [26] |
| 55. | *7AL* | *KsuH9c* | 127.4 | 4.4 | Trays in Growth cabinet | CD87/Katepwa (DH) | [26] |
| 56. | *4AS* | *gwm637* | 41.8 | 0.3 | Trays in Growth cabinet | Kukri/Janz (DH) | [26] |
| 57. | *4BS* | *Rht-B1b* | 12 | 22.5 | Trays in Growth cabinet | Kukri/Janz (DH) | [26] |
| 58. | *4DS* | *Rht-D1b* | 1.8 | 27.3 | Trays in Growth cabinet | Kukri/Janz (DH) | [26] |
| 59. | *6BL* | *gwm219* | 176 | 6.7 | Trays in Growth cabinet | Kukri/Janz (DH) | [26] |
| 60. | *1B* | *XpGTG-mTCGA294* | 31 | 12 | Germination paper | Wangshubai/Wheaton (RIL) | [27] |
| 61. | *3D* | *XpCATG-mGCG449* | 19 | 8 | Germination paper | Wangshubai/Wheaton (RIL) | [27] |
| 62. | *4DS* | *Rht-D1* | 6 | 65 | Germination paper | Wangshubai/Wheaton (RIL) | [27] |
| 63. | *4DL* | *gwm194* | 15 | 33 | Germination paper | Wangshubai/Wheaton (RIL) | [27] |
| 64. | *5AS* | *pCAT-mGAC306* | 8 | 22 | Germination paper | Wangshubai/Wheaton (RIL) | [27] |
| 65. | *5B* | *pACT-mCTA113* | 51 | 13 | Germination paper | Wangshubai/Wheaton (RIL) | [27] |
| 66. | *QClp.ipk-1A* | *abc157c* | NA | 9 | PEG media | Opata 85/Synthetic hexaploid W7984 (RIL) | [28] |
| 67. | *QClp.ipk-1B* | *do1173* | NA | 13 | PEG media | Opata 85/Synthetic hexaploid W7984 (RIL) | [28] |
| 68. | *QClp.ipk-6B* | *barc178* | NA | 14 | PEG media | Opata 85/Synthetic hexaploid W7984 (RIL) | [28] |
| **c.** | **Canopy temperature** |  |  |  |  |  |  |
| 1. | *QCt.vg-4A* | *wmc048d* | 12.92 | 5.2 | Field | Seri M82/Babax (RILs) | [3] |
| 2. | *QCt.gf-7D.b* | *C29P13* | 12.5 | 4.3 | Field | Seri M82/Babax (RILs) | [3] |
| 3. | 1B-a | *wPt-5281* | 34.8 | 6.9 | Field | Seri/Babax (RILs) | [6] |
| 4. | 2B-a | *gwm388* | 45.5 | 5.9 | Field | Seri/Babax (RILs) | [6] |
| 5. | 5A-a | *barc186* | 55.32 | 6.4 | Field | Seri/Babax (RILs) | [6] |
| 6. | 7A-a | *aag/cta-7* | 247.8 | 6.3 | Field | Seri/Babax (RILs) | [6] |
| 7. | *Q.Ctgf.aww-1B* | *WPT-0506* | 117.1 | 5 | Field | RAC875/Kukri (DH) | [10] |
| 8. | *Q.Ctgf.aww-6B* | *WPT-3118* | 0 | 2 | Field | RAC875/Kukri (DH) | [10] |
| 9. | *qCTWD.1A.1* | *barc28* | 11.3 | 9 | Field | WL711/C306 (RILs) | [12] |
| 10. | *qCTWD.3B.1* | *cfp56* | 87.8 | 13.2 | Field | WL711/C306 (RILs) | [12] |
| 11. | 2AS | *gwm47* | 34.8 | NR | Field | Jennah Khetifa/Cham1 (RIL) (Durum) | [29] |
| 12. | 2BL | *gwm108* | 415 | NR | Field | Jennah Khetifa/Cham1 (RIL;Durum) | [29] |
| 13. | 2BS | *gwm148* | 104.7 | NR | Field | Jennah Khetifa/Cham1 (RIL) (Durum) | [29] |
| 14. | 3AL | *gwm155* | 118.4 | NR | Field | Jennah Khetifa/Cham1 (RIL) (Durum) | [29] |
| 15. | 3AS | *gwm369* | 31.3 | NR | Field | Jennah Khetifa/Cham1 (RIL) (Durum) | [29] |
| 16. | 3B | *gwm389* | 0 | NR | Field | Jennah Khetifa/Cham1 (RIL) (Durum) | [29] |
| 17. | 3BL | *gwm299* | 248.5 | NR | Field | Jennah Khetifa/Cham1 (RIL) (Durum) | [29] |
| 18. | 3BS | *gwm389* | 0 | NR | Field | Jennah Khetifa/Cham1 (RIL) (Durum) | [29] |
| 19. | 4AL | *gwm637* | 381.9 | NR | Field | Jennah Khetifa/Cham1 (RIL) (Durum) | [29] |
| 20. | 4AS | *gwm613* | 41.7 | NR | Field | Jennah Khetifa/Cham1 (RIL) (Durum) | [29] |
| 21. | 4B | *gwm165* | 423.2 | NR | Field | Jennah Khetifa/Cham1 (RIL) (Durum) | [29] |
| 22. | 4BL | *gwm6* | 454.2 | NR | Field | Jennah Khetifa/Cham1 (RIL) (Durum) | [29] |
| 23. | 5AL | *gwm126* | 154.8 | NR | Field | Jennah Khetifa/Cham1 (RIL) (Durum) | [29] |
| 24. | 6AL | *gwm427* | 294.7 | NR | Field | Jennah Khetifa/Cham1 (RIL) (Durum) | [29] |
| 25. | 6BL | *gwm644* | 280.8 | NR | Field | Jennah Khetifa/Cham1 (RIL) (Durum) | [29] |
| **d.** | **Carbon isotope discrimination** |  |  |  |  |  |  |
| 1. | 1BS | *gwm666* | 15.3 | 4 | Field | Cranbrook/Halberd (DH) | [30] |
| 2. | 2AS | *wPt-3114* | 43.8 | 9 | Field | Cranbrook/Halberd (DH) | [30] |
| 3. | 2DS | *ppd1* | 37.7 | 10 | Field | Cranbrook/Halberd (DH) | [30] |
| 4. | 3BS | *cdo395* | 54.3 | 5 | Field | Cranbrook/Halberd (DH) | [30] |
| 5. | 4AS | *gwm192* | 23.7 | 4 | Field | Cranbrook/Halberd (DH) | [30] |
| 6. | 4BS | *gwm495* | 63.4 | 5 | Field | Cranbrook/Halberd (DH) | [30] |
| 7. | 5AS | *wPt-2768* | 19 | 4 | Field | Cranbrook/Halberd (DH) | [30] |
| 8. | 5AL | *psr426* | 115.3 | 3 | Field | Cranbrook/Halberd (DH) | [30] |
| 9. | 5BL | *bcd351* | 76.1 | 4 | Field | Cranbrook/Halberd (DH) | [30] |
| 10. | 6DL | *cmwg684a* | 147.1 | 2 | Field | Cranbrook/Halberd (DH) | [30] |
| 11. | 7AS | *wmc83* | 66.4 | 2 | Field | Cranbrook/Halberd (DH) | [30] |
| 12. | 7BS | *gwm537* | 50.4 | 4 | Field | Cranbrook/Halberd (DH) | [30] |
| 13. | 1BL | *ksuI27a* | 142 | 4 | Field | Sunco/Tasman (DH) | [30] |
| 14. | 1DL | *cdo393* | 70.2 | 5 | Field | Sunco/Tasman (DH) | [30] |
| 15. | 2AL | *gwm526* | 71 | 3 | Field | Sunco/Tasman (DH) | [30] |
| 16. | 2BS | *wmc154* | 55.1 | 4 | Field | Sunco/Tasman (DH) | [30] |
| 17. | 2DL | *bcd266b* | 84.1 | 5 | Field | Sunco/Tasman (DH) | [30] |
| 18. | 3BS | *psr902* | 54.3 | 4 | Field | Sunco/Tasman (DH) | [30] |
| 19. | 4AS | *gwm192* | 11.4 | 3 | Field | Sunco/Tasman (DH) | [30] |
| 20. | 4BS | *Rht-B1* | 15.6 | 4 | Field | Sunco/Tasman (DH) | [30] |
| 21. | 4DS | *Rht-D1* | 1 | 5 | Field | Sunco/Tasman (DH) | [30] |
| 22. | 6DL | *scuM06* | 57.8 | 3 | Field | Sunco/Tasman (DH) | [30] |
| 23. | 7AS | *sun1* | 55.2 | 3 | Field | Sunco/Tasman (DH) | [30] |
| 24. | 7BS | *wmc364* | 38.4 | 5 | Field | Sunco/Tasman (DH) | [30] |
| 25. | 7BL | *wmc273* | 128.1 | 4 | Field | Sunco/Tasman (DH) | [30] |
| 26. | 1BL | *psr305* | 177.2 | 8 | Field | CD87/Katepwa (DH) | [30] |
| 27. | 2BS | *wmc154* | 2 | 3 | Field | CD87/Katepwa (DH) | [30] |
| 28. | 3BL | *P35/M37-1* | 125.1 | 3 | Field | CD87/Katepwa (DH) | [30] |
| 29. | 4AS | *abg484* | 30.7 | 9 | Field | CD87/Katepwa (DH) | [30] |
| 30. | 4BS | *ksuC2* | 67.9 | 4 | Field | CD87/Katepwa (DH) | [30] |
| 31. | 4DS | *wmc48b* | 12.5 | 3 | Field | CD87/Katepwa (DH) | [30] |
| 32. | 5AS | *P41/38-5* | 45.7 | 4 | Field | CD87/Katepwa (DH) | [30] |
| 33. | 6BS | *gwm644* | 10.4 | 3 | Field | CD87/Katepwa (DH) | [30] |
| 34. | 7AL | *ksuH9c* | 127.4 | 4 | Field | CD87/Katepwa (DH) | [30] |
| 35. | *Q.cgb-1A* | *wmc336* | 35.31 | 8.44 | Field | Hanxuan 10 /Lumai 14 (DH) | [13] |
| 36. | *Q.cgb-7A.1* | *P8150* | 90.91 | 11.06 | Field | Hanxuan 10 /Lumai 14 (DH) | [13] |
| 37. | *Q.cgb-7A.2* | *wmc488* | 176.41 | 9.42 | Field | Hanxuan 10 /Lumai 14 (DH) | [13] |
| 38. | *2BL* | *gwm108* | 415 | NR | Field | Jennah Khetifa/Cham1 (RIL) (Durum) | [29] |
| 39. | *3AS* | *gwm369* | 31.3 | NR | Field | Jennah Khetifa/Cham1 (RIL) (Durum) | [29] |
| 40. | *3BL* | *gwm247* | 328.6 | NR | Field | Jennah Khetifa/Cham1 (RIL) (Durum) | [29] |
| 41. | *3BL* | *gwm299* | 248.5 | NR | Field | Jennah Khetifa/Cham1 (RIL) (Durum) | [29] |
| 42. | *3BS* | *gwm389* | 0 | NR | Field | Jennah Khetifa/Cham1 (RIL) (Durum) | [29] |
| 43. | *4AL* | *gwm637* | 381.9 | NR | Field | Jennah Khetifa/Cham1 (RIL) (Durum) | [29] |
| 44. | *4B* | *gwm165* | 423.2 | NR | Field | Jennah Khetifa/Cham1 (RIL) (Durum) | [29] |
| 45. | *5A* | *gwm129* | 12.2 | NR | Field | Jennah Khetifa/Cham1 (RIL) (Durum) | [29] |
| 46. | *5BS* | *gwm234* | 91.6 | NR | Field | Jennah Khetifa/Cham1 (RIL) (Durum) | [29] |
| 47. | *6B* | *gwm644* | 280.8 | NR | Field | Jennah Khetifa/Cham1 (RIL) (Durum) | [29] |
| 48. | *1A* | *gwm778* | 27 | 0.8 | Greenhouse | Langdon/G18-16 (RIL; Durum) | [16] |
| 49. | *4A* | *gwm1093* | 4.8788 | 9.9 | Greenhouse | Langdon/G18-16 (RIL; Durum) | [16] |
| 50. | *5A* | *wmc415* | 68.456 | 17.2 | Greenhouse | Langdon/G18-16 (RIL; Durum) | [16] |
| 51. | *5B* | *gwm408* | 109.88 | 27.4 | Greenhouse | Langdon/G18-16 (RIL; Durum) | [16]) |
| 52. | *5B* | *gwm814* | 135.5 | 27.4 | Greenhouse | Langdon/G18-16 (RIL; Durum) | [16] |
| 53. | *6B* | *gwm771* | 36 | 9.6 | Greenhouse | Langdon/G18-16 (RIL; Durum) | [16] |
| 54. | *7B* | *gwm400* | 35 | 7.1 | Greenhouse | Langdon/G18-16 (RIL; Durum) | [16] |
| **e.** | **NDVI** |  |  |  |  |  |  |
| 1. | *2B-a* | *aag/cac-5* | 42.2 | 8.1 | Field | Seri/Babax (RILs) | [6] |
| 2. | *Q.Ndvi.aww-2A* | *GWM0382B* | 148.7 | 3 | Field | RAC875/Kukri (DH) | [10] |
| 3. | *Q.Ndvi.aww-3D-1* | *WPT6262* | 94.1 | 7 | Field | RAC875/Kukri (DH) | [10] |
| 4. | *Q.Ndvi.aww-3D-2* | *BARC0071* | 180.4 | 2 | Field | RAC875/Kukri (DH) | [10] |
| 5. | *Q.Ndvi.aww-4A* | *WPT7001* | 12.9 | 7 | Field | RAC875/Kukri (DH) | [10] |
| 6. | *Q.Ndvi.aww-5B* | *BARC0088* | 61.6 | 9 | Field | RAC875/Kukri (DH) | [10] |
| **f.** | **Glaucousness** |  |  |  |  |  |  |
| 1. | *Qgla.2A.1* | *gwm389* | 1.7 | 4.1 | Field | Excalibur/Kukri (DH) | [7] |
| 2. | *QGla-2A.2* | *wmc177* | 75.6 | 4.4 | Field | Excalibur/Kukri (DH) | [7] |
| 3. | *QGla-2B* | *wPt-3459* | 5.88 | 11.56 | Field | Excalibur/Kukri (DH) | [7] |
| 4. | *QGla-7A* | *gwm60* | 80.1 | 13.12 | Field | Excalibur/Kukri (DH) | [7] |
| **g.** | **Water souluble carbohydrate** |  |  |  |  |  |  |
| 1. | *1B-a* | *wPt-5503* | 54 | 6 | Field | Seri/Babax (RILs) | [8] |
| 2. | *4A-a* | *agg/cta-2* | 13 | 7.1 | Field | Seri/Babax (RILs) | [8] |
| 3. | *4A-b* | *wPt-1155* | 101 | 6.8 | Field | Seri/Babax (RILs) | [8] |
| 4. | *4B-b* | *agc/cag-2* | 37 | 6.6 | Field | Seri/Babax (RILs) | [8] |
| 5. | *6B-a* | *aca/cac-3* | 111 | 6.5 | Field | Seri/Babax (RILs) | [8] |
| 6. | *QWsc-a.aww-3A* | *WMC0388A* | 64.9 | 10 | Field | RAC875/Kukri (DH) | [9] |
| 7. | *QWsc-a.aww-6A* | *WMC0256A* | 121.5 | 6 | Field | RAC875/Kukri (DH) | [9] |
| 8. | *QWsc-c.aww-2D* | *BARC0328B* | 82.2 | 8 | Field | RAC875/Kukri (DH) | [9] |
| 9. | *QWsc-c.aww-3A* | *WMC0388A* | 64.9 | 19 | Field | RAC875/Kukri (DH) | [9] |
| 10. | *QWsc-t.aww-3A* | *WMC0388A* | 67.7 | 9 | Field | RAC875/Kukri (DH) | [9] |
| 11. | *1AL* | *bcd808b* | 109 | 2 | Field | Cranbrook/Halberd (DH) | [31] |
| 12. | *2AS* | *P34/M50-9* | 56 | 2 | Field | Cranbrook/Halberd (DH) | [31] |
| 13. | *2BS* | *P35/M51-1* | 62 | 5 | Field | Cranbrook/Halberd (DH) | [31] |
| 14. | *2BS* | *wmc154* | 53 | 4 | Field | Cranbrook/Halberd (DH) | [31] |
| 15. | *2DS* | *ppd1* | 48 | 30 | Field | Cranbrook/Halberd (DH) | [31] |
| 16. | *3AS* | *P35/M54-5* | 99 | 2 | Field | Cranbrook/Halberd (DH) | [31] |
| 17. | *3BS* | *bcd809* | 95 | 2 | Field | Cranbrook/Halberd (DH) | [31] |
| 18. | *3BS* | *P40/M54-7* | 86 | 2 | Field | Cranbrook/Halberd (DH) | [31] |
| 19. | *3DS* | *P35/M54-2* | 49 | 4 | Field | Cranbrook/Halberd (DH) | [31] |
| 20. | *4AS* | *psr115* | 64 | 3 | Field | Cranbrook/Halberd (DH) | [31] |
| 21. | *4BS* | *cdo669b* | 35 | 7 | Field | Cranbrook/Halberd (DH) | [31] |
| 22. | *4BS* | *gwm495* | 61 | 5 | Field | Cranbrook/Halberd (DH) | [31] |
| 23. | *4DS* | *wmc48b* | 11 | 2 | Field | Cranbrook/Halberd (DH) | [31] |
| 24. | *5BS* | *bcd351* | 77 | 2 | Field | Cranbrook/Halberd (DH) | [31] |
| 25. | *5BS* | *P37/M47-3* | 86 | 3 | Field | Cranbrook/Halberd (DH) | [31] |
| 26. | *5DS* | *P35/M57-3* | 69 | 3 | Field | Cranbrook/Halberd (DH) | [31] |
| 27. | *6BS* | *gwm644* | 14 | 4 | Field | Cranbrook/Halberd (DH) | [31] |
| 28. | *7AL* | *wmc116* | 142 | 3 | Field | Cranbrook/Halberd (DH) | [31] |
| 29. | *7AL* | *P31/M48-2* | 107 | 3 | Field | Cranbrook/Halberd (DH) | [31] |
| 30. | *7AS* | *abg75b* | 22 | 2 | Field | Cranbrook/Halberd (DH) | [31] |
| 31. | *7BL* | *P42/M48-1* | 126 | 3 | Field | Cranbrook/Halberd (DH) | [31] |
| 32. | *7DL* | *gwm437* | 118 | 2 | Field | Cranbrook/Halberd (DH) | [31] |
| 33. | *1AS* | *wmc24* | 14 | 4 | Field | Sunco/Tasman (DH) | [31] |
| 34. | *1DS* | *P35/M76-2* | 73 | 3 | Field | Sunco/Tasman (DH) | [31] |
| 35. | *2BL* | *P35/M76-1* | 88 | 5 | Field | Sunco/Tasman (DH) | [31] |
| 36. | *3BS* | *fbb185* | 4 | 4 | Field | Sunco/Tasman (DH) | [31] |
| 37. | *4AS* | *gwm192a* | 7 | 4 | Field | Sunco/Tasman (DH) | [31] |
| 38. | *4BS* | *Rht-B1* | 8 | 3 | Field | Sunco/Tasman (DH) | [31] |
| 39. | *4DS* | *Rht-D1* | 0 | 4 | Field | Sunco/Tasman (DH) | [31] |
| 40. | *5BS* | *gwm499* | 24 | 6 | Field | Sunco/Tasman (DH) | [31] |
| 41. | *5BS* | *P41/M48-178* | 16 | 4 | Field | Sunco/Tasman (DH) | [31] |
| 42. | *6BS* | *gwm644* | 6 | 4 | Field | Sunco/Tasman (DH) | [31] |
| 43. | *7BS* | *gwm400* | 3 | 9 | Field | Sunco/Tasman (DH) | [31] |
| 44. | *1AL* | *wmc84* | 114 | 3 | Field | CD87/Katepwa (DH) | [31] |
| 45. | *1AL* | *wmc120* | 126 | 3 | Field | CD87/Katepwa (DH) | [31] |
| 46. | *1BL* | *P32/M32-1* | 171 | 4 | Field | CD87/Katepwa (DH) | [31] |
| 47. | *2AS* | *P34/M50-9* | 28 | 9 | Field | CD87/Katepwa (DH) | [31] |
| 48. | *2DS* | *ppd1* | 57 | 28 | Field | CD87/Katepwa (DH) | [31] |
| 49. | *3AS* | *cdo360* | 38 | 3 | Field | CD87/Katepwa (DH) | [31] |
| 50. | *3BS* | *P34/M50-5* | 6 | 3 | Field | CD87/Katepwa (DH) | [31] |
| 51. | *4BS* | *fba363* | 33 | 3 | Field | CD87/Katepwa (DH) | [31] |
| 52. | *4BS* | *Rht-B1* | 54 | 4 | Field | CD87/Katepwa (DH) | [31] |
| 53. | *5BS* | *gwm67* | 20 | 2 | Field | CD87/Katepwa (DH) | [31] |
| 54. | *5BS* | *P34/M50-11* | 162 | 2 | Field | CD87/Katepwa (DH) | [31] |
| 55. | *5DS* | *gwm5837* | 18 | 3 | Field | CD87/Katepwa (DH) | [31] |
| 56. | *5DS* | *gwm174* | 34 | 4 | Field | CD87/Katepwa (DH) | [31] |
| 57. | *6DS* | *P42/M50-4* | 16 | 4 | Field | CD87/Katepwa (DH) | [31] |
| 58. | *7AL* | *psr806* | 208 | 3 | Field | CD87/Katepwa (DH) | [31] |
| 59. | *7AL* | *P35/M37-8* | 137 | 4 | Field | CD87/Katepwa (DH) | [31] |
| 60. | *7DS* | *wmc405b* | 74 | 4 | Field | CD87/Katepwa (DH) | [31] |
| 61. | *QSwscf.cgb-1A.1* | *WMC59–WMC254* | 10 | 4.34 | Feild | Hanxuan 10 /Lumai 14 (DH) | [19] |
| 62. | *QSwscf.cgb-1D.1* | *WMC432–WMC222* | 0 | 1.87 | Feild | Hanxuan 10 /Lumai 14 (DH) | [19] |
| 63. | *QSwscf.cgb-2D.1* | *WMC453.1–WMC18* | 0 | 3.41 | Feild | Hanxuan 10 /Lumai 14 (DH) | [19] |
| 64. | *QSwscf.cgb-2D.2* | *WMC41–WMC170* | 0 | 1.06 | Feild | Hanxuan 10 /Lumai 14 (DH) | [19] |
| 65. | *QSwscf.cgb-4A* | *WMC420–gwm601* | 3 | 2.39 | Feild | Hanxuan 10 /Lumai 14 (DH) | [19] |
| 66. | *QSwscf.cgb-4B.1* | *gwm368–gwm107* | 15 | 8.8 | Feild | Hanxuan 10 /Lumai 14 (DH) | [19] |
| 67. | *QSwscf.cgb-7B.1* | *CWM467–CWM466* | 0 | 3.97 | Feild | Hanxuan 10 /Lumai 14 (DH) | [19] |
| 68. | *QSwscf.cgb-7D* | *gdm88–WMC463* | 0 | 2.62 | Feild | Hanxuan 10 /Lumai 14 (DH) | [19] |
| 69. | *QSwscg.cgb-4A* | *gwm610–gwm397* | 4 | 5.6 | Feild | Hanxuan 10 /Lumai 14 (DH) | [19] |
| 70. | *QSwscm.cgb-1A.1* | *CWM516–CWM517* | 0 | 7.53 | Feild | Hanxuan 10 /Lumai 14 (DH) | [19] |
| 71. | *QSwscm.cgb-6B.1* | *gwm219–WMC341* | 0 | 2.49 | Feild | Hanxuan 10 /Lumai 14 (DH) | [19] |
| 72. | *1B* | *gwm268* | 64 | N/A | Field | Spark/Rialto (DH) | [32] |
| 73. | *3B* | *gwm389* | 1 | N/A | Field | Spark/Rialto (DH) | [32] |
| 74. | *2B* | *Wmc332* | 93 | N/A | Field | Spark/Rialto (DH) | [32] |
| 75. | *4B* | *gwm251* | 36 | N/A | Field | Spark/Rialto (DH) | [32] |
| 76. | *7A* | *psp3094* | 100 | N/A | Field | Spark/Rialto (DH) | [32] |
| **h.** | **Early vigor** |  |  |  |  |  |  |
| 1. | *QEv.aww-2B* | *BARC0013A* | 43.2 | 3 | Field | RAC875/Kukri (DH) | [9] |
| 2. | *QEv.aww-2D* | *PPD-D1* | 43 | 18 | Field | RAC875/Kukri (DH) | [9] |
| 3. | *QEv.aww-2D* | *PPD-D1* | 45 | 12 | Field | RAC875/Kukri (DH) | [9] |
| 4. | *QEv.aww-3B* | *GWM0131A* | 108.8 | 6 | Field | RAC875/Kukri (DH) | [9] |
| 5. | *QEv.aww-3D* | *WPT-2464* | 6 | 5 | Field | RAC875/Kukri (DH) | [9] |
| 6. | *QEv.aww-5B* | *WPT-4936* | 101.5 | 8 | Field | RAC875/Kukri (DH) | [9] |
| 7. | *QEv.aww-6A* | *WPT-7599* | 76.5 | 7 | Field | RAC875/Kukri (DH) | [9] |
| 8. | *QEv.aww-7A-1* | *BARC0108* | 117.6 | 3 | Field | RAC875/Kukri (DH) | [9] |
| 9. | *QEv.aww-7A-2* | *WPT-5153* | 94.2 | 3 | Field | RAC875/Kukri (DH) | [9] |
| 10. | *QEv.aww-7B* | *BARC0338* | 13 | 6 | Field | RAC875/Kukri (DH) | [9] |
| **i.** | **SPAD/chlorophyll content** |  |  |  |  |  |  |
| 1. | *Q.Spad.aww-2B* | *WPT7200* | 82.4 | 10 | Field | RAC875/Kukri (DH) | [10] |
| 2. | *Q.Spad.aww-3B* | *WPT7225* | 0 | 8 | Field | RAC875/Kukri (DH) | [10] |
| 3. | *Q.Spad.aww-4B* | *BARC0340A* | 0 | 9 | Field | RAC875/Kukri (DH) | [10] |
| 4. | *Q.Spad.aww-4D* | *GWM0297B* | 5 | 10 | Field | RAC875/Kukri (DH) | [10] |
| 5. | *Q.Spad.aww-6A-1* | *WPT2636* | 15.2 | 6 | Field | RAC875/Kukri (DH) | [10] |
| 6. | *Q.Spad.aww-6A-2* | *WPT7599* | 77.5 | 6 | Field | RAC875/Kukri (DH) | [10] |
| 7. | *Q.Spad.aww-6B-1* | *WPT1700* | 69.1 | 3 | Field | RAC875/Kukri (DH) | [10] |
| 8. | *Qchl.ksu-2B* | *gwm356* | N/A | 50.1 | Greenhouse/Growth chamber | C306/HUW206 (RIL) | [33] |
| 9. | *Qchl.ksu-3A* | *barc12* | N/A | 30.5 | Greenhouse/Growth chamber | C306/HUW206 (RIL) | [33] |
| 10. | *Qchl.ksu-3B* | *barc68* | 67.2 | 59.1 | Greenhouse/Growth chamber | C306/HUW206 (RIL) | [33] |
| 11. | *Qchl.ksu-4B* | *cfa349* | N/A | 45.2 | Greenhouse/Growth chamber | C306/HUW206 (RIL) | [33] |
| 12. | *Qchl.ksu-6A* | *wmc427* | 67 | 16.9 | Greenhouse/Growth chamber | C306/HUW206 (RIL) | [33] |
| 13. | *QFv/Fm.Ksu-2B* | *cfa175* | N/A | 46.5 | Greenhouse/Growth chamber | C306/HUW206 (RIL) | [33] |
| 14. | *QFv/Fm.Ksu-3A* | *barc12* | N/A | 20.4 | Greenhouse/Growth chamber | C306/HUW206 (RIL) | [33] |
| 15. | *QFv/Fm.Ksu-3B* | *barc68* | N/A | 56.1 | Greenhouse/Growth chamber | C306/HUW206 (RIL) | [33] |
| 16. | *QFv/Fm.Ksu-4B* | *cfa349* | N/A | 39.8 | Greenhouse/Growth chamber | C306/HUW206 (RIL) | [33] |
| 17. | *QFv/Fm.Ksu-4D* | *cfa285* | N/A | 46.4 | Greenhouse/Growth chamber | C306/HUW206 (RIL) | [33] |
| 18. | *QFv/Fm.Ksu-6A* | *gwm427* | N/A | 16.1 | Greenhouse/Growth chamber | C306/HUW206 (RIL) | [33] |
| 19. | *2A* | *Srap11* | 14.9 | 42 | Field | Pavon76/Yecora Rojo (RIL) | [34] |
| 20. | *2A* | *Srap14* | 12.6 | 53 | Field | Pavon76/Yecora Rojo (RIL) | [34] |
| 21. | *3B* | *Srap15* | 10.4 | 50 | Field | Pavon76/Yecora Rojo (RIL) | [34] |
| 22. | *7A* | *Srap54* | 20.4 | 38 | Field | Pavon76/Yecora Rojo (RIL) | [34] |
| 23. | *1D* | *Srap59* | 22.7 | 46 | Field | Pavon76/Yecora Rojo (RIL) | [34] |
| 24. | *2AS* | *gwm47* | 34.8 | NR | Field | Jennah Khetifa/Cham1 (RIL) (Durum) | [29] |
| 25. | *5B* | *gwm234* | 91.6 | NR | Field | Jennah Khetifa/Cham1 (RIL) (Durum) | [29] |
| 26. | *6B* | *gwm644* | 280.8 | NR | Field | Jennah Khetifa/Cham1 (RIL) (Durum) | [29] |
| 27. | *1A* | *gwm752b* | 27 | 3.3 | Greenhouse | Langdon/G18-16 (RIL; Durum) | [16] |
| 28. | *4A* | *gwm637* | 37 | 4.9 | Greenhouse | Langdon/G18-16 (RIL; Durum) | [16] |
| 29. | *5A* | *gwm293* | 52 | 4.9 | Greenhouse | Langdon/G18-16 (RIL; Durum) | [16] |
| 30. | *6A* | *gwm1210* |  | 10 | Greenhouse | Langdon/G18-16 (RIL; Durum) | [16] |
| 31. | *7A* | *gwm1083* | 90.75 | 2.7 | Greenhouse | Langdon/G18-16 (RIL; Durum) | [16] |
| 32. | *5B* | *gwm408* | 109.88 | 8.2 | Greenhouse | Langdon/G18-16 (RIL; Durum) | [16] |
| 33. | *Qspad.acs-1A.1* | *gwm633* | 48 | 0.73 | Field | Longjian 19/Q9086 (RIL) | [35] |
| 34. | *Qspad.acs-1A.2* | *gwm135* | 57 | 0.91 | Field | Longjian 19/Q9086 (RIL) | [35] |
| 35. | *Qspad.acs-1A.3* | *gwm357* | 36.5 | 0.87 | Field | Longjian 19/Q9086 (RIL) | [35] |
| 36. | *Qspad.acs-1B.1* | *gwm11* | 36.2 | 0.63 | Field | Longjian 19/Q9086 (RIL) | [35] |
| 37. | *Qspad.acs-1B.2* | *mag2064* | 47 | 0.82 | Field | Longjian 19/Q9086 (RIL) | [35] |
| 38. | *Qspad.acs-1B.3* | *wmc85* | 29 | 0.68 | Field | Longjian 19/Q9086 (RIL) | [35] |
| 39. | *Qspad.acs-1B.4* | *wmc830* | 101 | 0.83 | Field | Longjian 19/Q9086 (RIL) | [35] |
| 40. | *Qspad.acs-1B.5* | *wmc582* | 59 | 0.56 | Field | Longjian 19/Q9086 (RIL) | [35] |
| 41. | *Qspad.acs-2A.1* | *gwm339* | 54 | 1.05 | Field | Longjian 19/Q9086 (RIL) | [35] |
| 42. | *Qspad.acs-2A.2* | *gwm249* | 67 | 0.59 | Field | Longjian 19/Q9086 (RIL) | [35] |
| 43. | *Qspad.acs-2A.3* | *gwm558* | 73.5 | 1.06 | Field | Longjian 19/Q9086 (RIL) | [35] |
| 44. | *Qspad.acs-2A.4* | *mag2150* | 52 | 0.95 | Field | Longjian 19/Q9086 (RIL) | [35] |
| 45. | *Qspad.acs-2A.5* | *wmc296* | 46.5 | 0.84 | Field | Longjian 19/Q9086 (RIL) | [35] |
| 46. | *Qspad.acs-2A.6* | *wmc644* | 79 | 1.29 | Field | Longjian 19/Q9086 (RIL) | [35] |
| 47. | *Qspad.acs-2B.1* | *cfa2278* | 43.2 | 0.58 | Field | Longjian 19/Q9086 (RIL) | [35] |
| 48. | *Qspad.acs-2B.2* | *gwm55* | 48.1 | 0.77 | Field | Longjian 19/Q9086 (RIL) | [35] |
| 49. | *Qspad.acs-2B.3* | *gwm388* | 57 | 0.59 | Field | Longjian 19/Q9086 (RIL) | [35] |
| 50. | *Qspad.acs-2B.4* | *wmc223* | 61 | 0.78 | Field | Longjian 19/Q9086 (RIL) | [35] |
| 51. | *Qspad.acs-3A.1* | *wmc11* | 8.5 | 0.76 | Field | Longjian 19/Q9086 (RIL) | [35] |
| 52. | *Qspad.acs-3A.2* | *wmc532* | 26 | 0.52 | Field | Longjian 19/Q9086 (RIL) | [35] |
| 53. | *Qspad.acs-3A.3* | *cfa2234* | 38 | 0.71 | Field | Longjian 19/Q9086 (RIL) | [35] |
| 54. | *Qspad.acs-3B.1* | *wmc808* | 14.2 | 0.42 | Field | Longjian 19/Q9086 (RIL) | [35] |
| 55. | *Qspad.acs-3B.2* | *mag3356* | 97 | 0.75 | Field | Longjian 19/Q9086 (RIL) | [35] |
| 56. | *Qspad.acs-3B.3* | *wmc540* | 35 | 0.75 | Field | Longjian 19/Q9086 (RIL) | [35] |
| 57. | *Qspad.acs-4A.1* | *mag987* | 99 | 0.61 | Field | Longjian 19/Q9086 (RIL) | [35] |
| 58. | *Qspad.acs-4B.1* | *gwm513* | 49 | 0.37 | Field | Longjian 19/Q9086 (RIL) | [35] |
| 59. | *Qspad.acs-4B.2* | *gwm540* | 16 | 0.5 | Field | Longjian 19/Q9086 (RIL) | [35] |
| 60. | *Qspad.acs-4B.3* | *gwm149* | 71 | 0.38 | Field | Longjian 19/Q9086 (RIL) | [35] |
| 61. | *Qspad.acs-5B.1* | *mag532* | 36 | 0.44 | Field | Longjian 19/Q9086 (RIL) | [35] |
| 62. | *Qspad.acs-5B.2* | *wmc734* | 46 | 0.86 | Field | Longjian 19/Q9086 (RIL) | [35] |
| 63. | *Qspad.acs-5B.3* | *wmc235* | 58 | 0.89 | Field | Longjian 19/Q9086 (RIL) | [35] |
| 64. | *Qspad.acs-5B.4* | *wmc415* | 121 | 0.69 | Field | Longjian 19/Q9086 (RIL) | [35] |
| 65. | *Qspad.acs-5D.1* | *wmc161* | 67 | 0.36 | Field | Longjian 19/Q9086 (RIL) | [35] |
| 66. | *Qspad.acs-5D.2* | *barc205* | 7 | 0.47 | Field | Longjian 19/Q9086 (RIL) | [35] |
| 67. | *Qspad.acs-6A.1* | *wmc201* | 35.5 | 0.49 | Field | Longjian 19/Q9086 (RIL) | [35] |
| 68. | *Qspad.acs-6A.2* | *barc171* | 87 | 0.36 | Field | Longjian 19/Q9086 (RIL) | [35] |
| 69. | *Qspad.acs-6A.3* | *gwm169* | 71 | 0.6 | Field | Longjian 19/Q9086 (RIL) | [35] |
| 70. | *Qspad.acs-6A.4* | *barc113* | 101.5 | 0.56 | Field | Longjian 19/Q9086 (RIL) | [35] |
| 71. | *Qspad.acs-6B.1* | *gwm508* | 4 | 0.7 | Field | Longjian 19/Q9086 (RIL) | [35] |
| 72. | *Qspad.acs-6B.2* | *cfd13* | 7 | 0.28 | Field | Longjian 19/Q9086 (RIL) | [35] |
| 73. | *Qspad.acs-6B.3* | *mag3469* | 23 | 0.32 | Field | Longjian 19/Q9086 (RIL) | [35] |
| 74. | *Qspad.acs-6B.4* | *gwm644* | 30 | 0.25 | Field | Longjian 19/Q9086 (RIL) | [35] |
| 75. | *Qspad.acs-7A.1* | *wmc603* | 94 | 0.56 | Field | Longjian 19/Q9086 (RIL) | [35] |
| 76. | *Qspad.acs-7A.2* | *wmc273* | 36 | 0.26 | Field | Longjian 19/Q9086 (RIL) | [35] |
| 77. | *Qspad.acs-7B.1* | *gwm302* | 61 | 0.31 | Field | Longjian 19/Q9086 (RIL) | [35] |
| 78. | *Qspad.acs-7B.2* | *wmc517* | 88 | 0.6 | Field | Longjian 19/Q9086 (RIL) | [35] |
| 79. | *Qspad.acs-7B.3* | *wmc311* | 106 | 0.55 | Field | Longjian 19/Q9086 (RIL) | [35] |
| 80. | *Qspad.acs-7D.1* | *gwm428* | 11 | 0.54 | Field | Longjian 19/Q9086 (RIL) | [35] |
| 81. | *Qspad.acs-7D.2* | *gwm37* | 61.6 | 0.25 | Field | Longjian 19/Q9086 (RIL) | [35] |
| 82. | *Qspad.acs-7D.3* | *cfd46* | 21 | 0.68 | Field | Longjian 19/Q9086 (RIL) | [35] |
| **j.** | ***Cell membrane stability*** |  |  |  |  |  |  |
| 1. | *7A* | *wmc9* | N/A | N/A | Field | Jiana/Izvor (DH) | [36] |
| 2. | *7A* | *wmc596* | N/A | N/A | Field | Jiana/Izvor (DH) | [36] |
| 3. | *7A* | *barc108* | N/A | N/A | Field | Jiana/Izvor (DH) | [36] |
| 4. | *2A* | *Srap8* | 22.5 | 44 | Field | Pavon76/Yecora Rojo (RIL) | [34] |
| 5. | *3B* | *Srap26* | 22.9 | 31 | Field | Pavon76/Yecora Rojo (RIL) | [34] |
| 6. | *1D* | *Srap64* | 9.5 | 38 | Field | Pavon76/Yecora Rojo (RIL) | [34] |
| 7. | *1B* | *Srap75* | 20.7 | 41 | Field | Pavon76/Yecora Rojo (RIL) | [34] |
| 8. | *5A* | *Srap85* | 16.5 | 25 | Field | Pavon76/Yecora Rojo (RIL) | [34] |
| **k.** | **Abscisic acid (ABA) accumulation** |  |  |  |  |  |  |
| 1. | 5AL | *psr426* | N/A | N/A | Growth cabinet | Chinese Spring/SQ1 (F2) | [37] |
| 2. | 1B | *Barc81* | 16.2 | 15 | Field | Pavon76/Yecora Rojo | [38] |
| 3. | 2A | *Wmc177* | 16.2 | 16 | Field | Pavon76/Yecora Rojo | [38] |
| 4. | 3A | *Barc45* | 22.1 | 31 | Field | Pavon76/Yecora Rojo | [38] |
| 5. | 4A | *Srap5* | 23.7 | 18 | Field | Pavon76/Yecora Rojo | [38] |
| 6. | 4A | *Trap1* | 21.7 | 22 | Field | Pavon76/Yecora Rojo | [38] |
| 7. | 4A | *Barc52* | 17.5 | 21 | Field | Pavon76/Yecora Rojo | [38] |
| 8. | 4A | *Wmc161* | 19.2 | 17 | Field | Pavon76/Yecora Rojo | [38] |
| 9. | 4A | *Wmc96* | 16.1 | 26 | Field | Pavon76/Yecora Rojo | [38] |
| 10. | 5A | *Srap93* | 20.2 | 22 | Field | Pavon76/Yecora Rojo | [38] |
| 11. | 5A | *Trap14* | 17.2 | 25 | Field | Pavon76/Yecora Rojo | [38] |
| 12. | 5A | *Srap89* | 15.6 | 30 | Field | Pavon76/Yecora Rojo | [38] |
| 13. | 5A | *Trap9* | 13.5 | 26 | Field | Pavon76/Yecora Rojo | [38] |
| 14. | 5A | *Barc10* | 19.8 | 27 | Field | Pavon76/Yecora Rojo | [38] |
| 15. | 5A | *Srap95* | 19 | 24 | Field | Pavon76/Yecora Rojo | [38] |
| 16. | 5D | *Barc110* | 24.3 | 18 | Field | Pavon76/Yecora Rojo | [38] |
| 17. | 7B | *Barc72* | 17.3 | 22 | Field | Pavon76/Yecora Rojo | [38] |
| **l.** | **Osmotic adjustment** |  |  |  |  |  |  |
| 1. | 3AL | *gwm155* | 118.4 | NR | Field | Jennah Khetifa/Cham1 (RIL) (Durum) | [29] |
| 2. | 4AL | *gwm637* | 381.9 | NR | Field | Jennah Khetifa/Cham1 (RIL) (Durum) | [29] |
| **m.** | **Osmotic Potential** |  |  |  |  |  |  |
| 1. | 1AL | *gwm33* | 31.5 | NR | Field | Jennah Khetifa/Cham1 (RIL) (Durum) | [29] |
| 2. | 2AS | *gwm47* | 34.8 | NR | Field | Jennah Khetifa/Cham1 (RIL) (Durum) | [29] |
| 3. | 2A | *gwm445* | 11 | 7.2 | Greenhouse | Langdon/G18-16 (RIL; Durum) | [16] |
| 4. | 2B | *gwm4828* | 79.528 | 8.9 | Greenhouse | Langdon/G18-16 (RIL; Durum) | [16] |
| 5. | 3A | *gwm1217* | 0 | 6.5 | Greenhouse | Langdon/G18-16 (RIL; Durum) | [16] |
| 6. | 3B | *gwm1029* | 54 | 2.7 | Greenhouse | Langdon/G18-16 (RIL; Durum) | [16] |
| 7. | 4B | *gwm1320* | 20.976 | 8.5 | Greenhouse | Langdon/G18-16 (RIL; Durum) | [16] |
| 8. | 5A | *gwm126* | 79 | 7.7 | Greenhouse | Langdon/G18-16 (RIL; Durum) | [16] |
| 9. | 5B | *gwm408* | 109.88 | 6.4 | Greenhouse | Langdon/G18-16 (RIL; Durum) | [16] |
| 10. | 6B | *gwm768* | 0 | 5.6 | Greenhouse | Langdon/G18-16 (RIL; Durum) | [16] |
| **n.** | **Photosynthetic active radiation** |  |  |  |  |  |  |
| 1. | 1AL | *gwm136* | 173.3 | NR | Field | Jennah Khetifa/Cham1 (RIL) (Durum) | [29] |
| 2. | 2BL | *gwm108* | 415 | NR | Field | Jennah Khetifa/Cham1 (RIL) (Durum) | [29] |
| 3. | 2BS | *gwm148* | 104.7 | NR | Field | Jennah Khetifa/Cham1 (RIL) (Durum) | [29] |
| 4. | 3AS | *gwm369* | 31.3 | NR | Field | Jennah Khetifa/Cham1 (RIL) (Durum) | [29] |
| 5. | 3B | *gwm389* | 0 | NR | Field | Jennah Khetifa/Cham1 (RIL) (Durum) | [29] |
| 6. | 3BL | *gwm299* | 248.5 | NR | Field | Jennah Khetifa/Cham1 (RIL) (Durum) | [29] |
| 7. | 3BL | *gwm247* | 328.6 | NR | Field | Jennah Khetifa/Cham1 (RIL) (Durum) | [29] |
| 8. | 4AL | *gwm637* | 381.9 | NR | Field | Jennah Khetifa/Cham1 (RIL) (Durum) | [29] |
| 9. | 4B | *gwm165* | 423.2 | NR | Field | Jennah Khetifa/Cham1 (RIL) (Durum) | [29] |
| 10. | 4BL | *gwm6* | 454.2 | NR | Field | Jennah Khetifa/Cham1 (RIL) (Durum) | [29] |
| 11. | 5A | *gwm126* | 154.8 | NR | Field | Jennah Khetifa/Cham1 (RIL) (Durum) | [29] |
| 12. | 5AL | *gwm126* | 154.8 | NR | Field | Jennah Khetifa/Cham1 (RIL) (Durum) | [29] |
| 13. | 5B | *gwm234* | 91.6 | NR | Field | Jennah Khetifa/Cham1 (RIL) (Durum) | [29] |
| 14. | 6A | *gwm427* | 294.7 | NR | Field | Jennah Khetifa/Cham1 (RIL) (Durum) | [29] |
| 15. | 6B | *gwm644* | 280.8 | NR | Field | Jennah Khetifa/Cham1 (RIL) (Durum) | [29] |
| **o.** | **Relative water content** |  |  |  |  |  |  |
| 1. | 2BL | *gwm108* | 415 | NR | Field | Jennah Khetifa/Cham1 (RIL) (Durum) | [29] |
| **p.** | **Transpiration** |  |  |  |  |  |  |
| 1. | 1AL | *gwm33* | 31.5 | NR | Field | Jennah Khetifa/Cham1 (RIL) (Durum) | [29] |
| 2. | 1BS | *gwm11* | 150.7 | NR | Field | Jennah Khetifa/Cham1 (RIL) (Durum) | [29] |
| 3. | 2BS | *gwm148* | 104.7 | NR | Field | Jennah Khetifa/Cham1 (RIL) (Durum) | [29] |
| 4. | 3AL | *gwm155* | 118.4 | NR | Field | Jennah Khetifa/Cham1 (RIL) (Durum) | [29] |
| 5. | 3AS | *gwm369* | 31.3 | NR | Field | Jennah Khetifa/Cham1 (RIL) (Durum) | [29] |
| 6. | 3B | *gwm389* | 0 | NR | Field | Jennah Khetifa/Cham1 (RIL) (Durum) | [29] |
| 7. | 4AL | *gwm637* | 381.9 | NR | Field | Jennah Khetifa/Cham1 (RIL) (Durum) | [29] |
| 8. | 4AS | *gwm613* | 41.7 | NR | Field | Jennah Khetifa/Cham1 (RIL) (Durum) | [29] |
| 9. | 4B | *gwm165* | 423.2 | NR | Field | Jennah Khetifa/Cham1 (RIL) (Durum) | [29] |
| 10. | 4BL | *gwm6* | 454.2 | NR | Field | Jennah Khetifa/Cham1 (RIL) (Durum) | [29] |
| 11. | 5AL | *gwm126* | 154.8 | NR | Field | Jennah Khetifa/Cham1 (RIL) (Durum) | [29] |
| 12. | 5B | *gwm234* | 91.6 | NR | Field | Jennah Khetifa/Cham1 (RIL) (Durum) | [29] |
| 13. | 6AL | *gwm427* | 294.7 | NR | Field | Jennah Khetifa/Cham1 (RIL) (Durum) | [29] |
| 14. | 6B | *gwm644* | 280.8 | NR | Field | Jennah Khetifa/Cham1 (RIL) (Durum) | [29] |
| **q.** | **Leaf rolling** |  |  |  |  |  |  |
| 1. | 1A | *gwm691* | 27 | 7.8 | Greenhouse | Langdon/G18-16 (RIL; Durum) | [16] |
| 2. | 2A | *gwm1054* | 57 | 7.3 | Greenhouse | Langdon/G18-16 (RIL; Durum) | [16] |
| 3. | 2B | *gwm1177* | 41.528 | 7 | Greenhouse | Langdon/G18-16 (RIL; Durum) | [16] |
| 4. | 2B | *gwm1249* | 66 | 7 | Greenhouse | Langdon/G18-16 (RIL; Durum) | [16]) |
| 5. | 4B | *gwm513* | 27 | 3.5 | Greenhouse | Langdon/G18-16 (RIL; Durum) | [16] |
| 6. | 5A | *gwm156* | 72 | 3.6 | Greenhouse | Langdon/G18-16 (RIL; Durum) | [16] |
| 7. | 5B | *gwm371* | 73 | 2.8 | Greenhouse | Langdon/G18-16 (RIL; Durum) | [16] |
| 8. | 6B | *gwm907* | 38 | 5.5 | Greenhouse | Langdon/G18-16 (RIL; Durum) | [16] |
| 9. | 7A | *gwm870* |  | 7 | Greenhouse | Langdon/G18-16 (RIL; Durum) | [16] |
| 10. | 7B | *gwm951* | 35 | 1.6 | Greenhouse | Langdon/G18-16 (RIL; Durum) | [16] |
| **III.** | **Root traits** |  |  |  |  |  |  |
| **a.** | **Root length** |  |  |  |  |  |  |
| 1. | *qMRL.4B.1* | *barc20* | 0.1 | 5.02 | PVC pipes | C306/WL711 (RILs) | [11 |
| 2. | *QRL.WY.4A2* | *wmc161* | 52 | 11.5 | Filterpaper/gwrothchamber | Weimai8/Yannong19 (RIL) | [22] |
| 3. | *QRL.WY.6B* | *swes131.3* | 1 | 6.4 | Filterpaper/gwrothchamber | Weimai8/Yannong19 (RIL) | [22] |
| 4. | *QRL.WL.3B* | *barc268* | 96 | 6.7 | Filterpaper/gwrothchamber | Weimai8/Luohan2 (RIL) | [22] |
| 5. | *QRL.WL.4A* | *ksue18.2* | 18 | 6.5 | Filterpaper/gwrothchamber | Weimai8/Luohan2 (RIL) | [22] |
| 6. | *QRL.WL.6A* | *me3em3.3* | 53 | 5.3 | Filterpaper/gwrothchamber | Weimai8/Luohan2 (RIL) | [22] |
| 7. | *QRL.WL.6D2* | *cfe277.1* | 12 | 15.6 | Filterpaper/gwrothchamber | Weimai8/Luohan2 (RIL) | [22] |
| 8. | *QRL.WL.7B1* | *wmc475* | 85 | 8.7 | Filterpaper/gwrothchamber | Weimai8/Luohan2 (RIL) | [22] |
| 9. | *QRlp.ipk-1A* | *Glu1A* | 3.93 | 16 | PEG media | Opata 85/Synthetic hexaploid W7984 (RIL) | [28 |
| 10. | *QRlp.ipk-6D* | *barc21* | NR | 7 | PEG media | Opata 85/Synthetic hexaploid W7984 (RIL) | [28] |
| 11. | *QRlp.ipk-7D* | *gwm37* | 144.9 | 10 | PEG media | Opata 85/Synthetic hexaploid W7984 (RIL) | [28] |
| **b.** | **Total root biomass** |  |  |  |  |  |  |
| 1. | *qTRB.2D.1* | *gwm484* | 38 | 9.4 | PVC pipes | C306/WL711 (RILs) | [11] |
| 2. | *qTRB.4B.1* | *barc20* | 0.1 | 10.8 | PVC pipes | C306/WL711 (RILs) | [11] |
| **c.** | **Root number** |  |  |  |  |  |  |
| 1. | *QRN.WL.6D1* | *cfe100.2* | 63 | 7.5 | Filterpaper | Weimai8/Luohan2 (RIL) | [22] |
| 2. | *QRN.WL.7B.1* | *gpw5187* | 63 | 7.3 | Filterpaper | Weimai8/Luohan2 (RIL) | [22] |
| 3. | *QRN.WL.7B.2* | *barc346.3* | 74 | 7.8 | Filterpaper | Weimai8/Luohan2 (RIL) | [22] |
| **d.** | **Root dry wieght** |  |  |  |  |  |  |
| 1. | *QRDW.WL.1D* | *me2em1.2* | 0 | 3.5 | Filterpaper | Weimai8/Luohan2 (RIL) | [22] |
| 2. | *QRDW.WL.3A* | *wmc415* | 84 | 7.5 | Filterpaper | Weimai8/Luohan2 (RIL) | [22] |
| 3. | *QRDW.WL.3B.2* | *barc102* | 95 | 3.8 | Filterpaper | Weimai8/Luohan2 (RIL) | [22] |
| 4. | *QRDW.WL.4A* | *cfe65.2* | 53 | 4.3 | Filterpaper | Weimai8/Luohan2 (RIL) | [22] |
| 5. | *QRDW.WL.6D* | *cfe100.2* | 50 | 6.8 | Filterpaper | Weimai8/Luohan2 (RIL) | [22] |
| **e.** | **Root to shoot ratio** |  |  |  |  |  |  |
| 1. | *QR:S.lan-2D* | *gwm484* | 18 | 8 | PEG media | Opata 85/Synthetic hexaploid W7984 (RIL) | [28] |
| 2. | *QR:S.lan-6D* | *barc21* | NR | 11 | PEG media | Opata 85/Synthetic hexaploid W7984 (RIL) | [28]) |

**Table S2.** List of MTAs for different traits detected using GWAS in wheat under drought.

| **S.No.** | **Trait/Chromosome** | **MTA** | **Position (cM)** | **PVE** | **Phenotyping (Field/Green House/Pots)** | **AM Pannel** | **Reference** |
| --- | --- | --- | --- | --- | --- | --- | --- |
| I. | **Grain yield and related trait** |  |  |  |  |  |  |
| **a.** | **Grain yield** |  |  |  |  |  |  |
| 1. | *wPt6531-2DS* | *wPt6531* | 67.3 | N/A | Field | WAM II | [39] |
| 2. | *wPt3457-5B* | *wPt3457* | 73.0 | N/A | Field | WAM II | [39] |
| 3. | *1AL* | *Kukri_c136_857* | 85.3 | N/A | Field | 123 Spring Wheat | [40] |
| 4. | *1AL* | *Tdurum_contig80278_250* | 86.4 | N/A | Field | 123 Spring Wheat | [40] |
| 5. | *4BL* | *RAC875_c23144_1560* | 101.2 | N/A | Field | 123 Spring Wheat | [40] |
| 6. | *6BL* | *Tdurum_contig53125_1716* | 90.9 | N/A | Field | 123 Spring Wheat | [40] |
| 7. | *7DS* | *tplb0024a09_742* | 50.9 | N/A | Field | 123 Spring Wheat | [40] |
| **b.** | **TGW** |  |  |  |  |  |  |
| 1. | *1BL* | *wPt1770* | 106.5 | N/A | Field | WAM II | [39] |
| 2. | *3BS* | *wPt6043* | 15.6 | N/A | Field | WAM II | [39] |
| 3. | *5B* | *wPt6105* | 72.4 | N/A | Field | WAM II | [39] |
| 4. | *4AL* | *wPt9833* | 77.0 | N/A | Field | WAM II | [39] |
| 5. | *2AL* | *Ku_c35823_743* | 164.8 | N/A | Field | 123 Spring Wheat | [40] |
| 6. | *2AL* | *CAP11_c2194_115* | 164.8 | N/A | Field | 123 Spring Wheat | [40] |
| 7. | *2AL* | *RAC875_rep_c77617_1454* | 164.8 | N/A | Field | 123 Spring Wheat | [40] |
| 8. | *3AL* | *BobWhite_c6300_169* | 79.4 | N/A | Field | 123 Spring Wheat | [40] |
| 9. | *3AL* | *Tdurum_contig15529_135* | 79.4 | N/A | Field | 123 Spring Wheat | [40] |
| 10. | *3BL* | *BS00022025_51* | 138.3 | N/A | Field | 123 Spring Wheat | [40] |
| 11. | *5BL* | *wsnp_Ex_rep_c66651_64926429* | 93.5 | N/A | Field | 123 Spring Wheat | [40] |
| 12. | *5BL* | *BS0041704_51* | 94.9 | N/A | Field | 123 Spring Wheat | [40] |
| 13. | *5BL* | *Excalibur_c49271_183* | 94.9 | N/A | Field | 123 Spring Wheat | [40] |
| 14. | *5BL* | *IAAV4074* | 94.9 | N/A | Field | 123 Spring Wheat | [40] |
| 15. | *QSZ.uaf.2A.1* | *WMC 455* | 59.0 | 7.6 | Field | 108 Spring Wheat | [41] |
| **c.** | **Gr[40] number per splike** |  |  |  |  |  |  |
| 1. | *tPt1755-7A* | *tPt1755* | 79.0 | N/A | Field | WAM II | [39] |
| 2. | *wPt5896-5B* | *wPt5896* | 93.7 | N/A | Field | WAM II | [39] |
| 3. | *wPt8473-7AS* | *wPt8473* | 13.7 | N/A | Field | WAM II | [39] |
| **d.** | **Gr[40] filling duration** |  |  |  |  |  |  |
| 1. | *wPt5836-3BS* | *wPt5836* | 39.1 | N/A | Field | WAM II | [39] |
| 2. | *tPt8942-5BS* | *tPt8942* | 35.1 | N/A | Field | WAM II | [39] |
| **e.** | **Days to maturity** |  |  |  |  |  |  |
| 1. | 2D | *wPt3728* | 90.5 | N/A | Field | WAM II | [39] |
| 2. | 1BS | *Excalibur_ c8052_541* | 47.4 | N/A | Field | 123 Spring Wheat | [40] |
| 3. | 2BS | *Kukri_c51619_265* | 57.3 | N/A | Field | 123 Spring Wheat | [40] |
| 4. | 7DL | *BS000099499_51* | 176.3 | N/A | Field | 123 Spring Wheat | [40] |
| **f.** | **Days to Heading** |  |  |  |  |  |  |
| 1. | *wPt10991-3B* | *wPt10991* | 30.2 | N/A | Field | WAM II | [39] |
| 2. | *wPt4199-2B* | *wPt4199* | 81.6 | N/A | Field | WAM II | [39] |
| 3. | *wPt5996-4B* | *wPt5996* | 104.9 | N/A | Field | WAM II | [39] |
| 4. | wPt6979-1DS | *wPt6979* | 19.5 | N/A | Field | WAM II | [39] |
| 5. | *wPt9422-3AL* | *wPt9422* | 166.7 | N/A | Field | WAM II | [39] |
| 6. | *1BS* | *Excalibur_c8052_541* | 47.4 | N/A | Field | 123 Spring Wheat | [40] |
| 7. | *2BS* | *Kukri_c51619_265* | 57.3 | N/A | Field | 123 Spring Wheat | [40] |
| 8. | *2BS* | *RAC875_c36104_356* | 79.7 | N/A | Field | 123 Spring Wheat | [40] |
| 9. | *3BL* | *BS00074688_51* | 85.6 | N/A | Field | 123 Spring Wheat | [40] |
| 10. | *7DL* | *BS00099499_51* | 176.3 | N/A | Field | 123 Spring Wheat | [40] |
| **g.** | **Spike density** |  |  |  |  |  |  |
| 1. | *1AL* | *IAAV1930* | 104.3 | N/A | Field | 123 Spring Wheat | [40] |
| 2. | *2BS* | *Excalibur_ 80601_308* | 86.1 | N/A | Field | 123 Spring Wheat | [40] |
| 3. | *5AL* | *tplb0049a09_1302* | 237.4 | N/A | Field | 123 Spring Wheat | [40] |
| **II.** | **NDVI** |  |  |  |  |  |  |
| 1. | *wPt3107-1AL* | *wPt3107* | 63.7 | N/A | Field | WAM II | [39] |
| 2. | *wPt667155-1BS* | *wPt667155* | 13.5 | N/A | Field | WAM II | [39] |
| **III.** | **Leaf green area** |  |  |  |  |  |  |
| 1. | *rPt9074-1BL* | *rPt9074* | 88.3 | N/A | Field | WAM II | [39] |
| 2. | *wPt5374-2BS* | *wPt5374* | 37.9 | N/A | Field | WAM II | [39] |
| 3. | *wPt734145-5AL* | *wPt734145* | 112.9 | N/A | Field | WAM II | [39] |
| **IV.** | **Coleoptile length** |  |  |  |  |  |  |
| 1. | *QCL.uaf.2A.1* | *barc124* | 08.0 | 10 | Field | 108 Spring Wheat | [41] |
| 2. | *QCL.uaf.2A.3* | *cfa2099* | 66.4 | 8.6 | Field | 108 Spring Wheat | [41] |
| **V.** | **Relative water content** |  |  |  |  |  |  |
| 1. | *QRWC.uaf.2A.1* | *WMC 407* | 15.0 | 12.2 | Field | 108 Spring Wheat | [41] |
| 2. | *QRWC.uaf.2A.2* | *GWM 312* | 74.0 | 17.8 | Field | 108 Spring Wheat | [41] |
| 3. | *QRWC.uaf.2A.3* | *WMC 181* | 103.0 | 6.5 | Field | 108 Spring Wheat | [41] |
| **VI.** | **Water-Soluble Carbohydrates** |  |  |  |  |  |  |
| 1. | 2D | *cfd53-2D* | NR | N/A | Field | 262 wheat accessions | [42] |
| 2. | 3B | *gwm181-3B* | NR | N/A | Field | 262 wheat accessions | [42] |
| 3. | 3B | *gwm389-3B* | NR | N/A | Field | 262 wheat accessions | [42] |
| 4. | 3D | *barc125-3D* | NR | N/A | Field | 262 wheat accessions | [42] |
| 5. | 5D | *gwm358-5D* | NR | N/A | Field | 262 wheat accessions | [42] |
| 6. | 7B | *gwm537-7B* | NR | N/A | Field | 262 wheat accessions | [42] |

**Table S3.** List of SNP markers identified for drought tolerance related traits based on candidate gene-based association mapping in wheat.

| **S. No.** | **Trait/Gene/Chromosome** | **Associated SNP** | **PVE** | **Phenotyping (Field/Green House/Pots)** | **AM Pannel** | **Reference** |
| --- | --- | --- | --- | --- | --- | --- |
| **I.** | **Grain yield and related traits** |  |  |  |  |  |
| **a.** | **Days to heading** |  |  |  |  |  |
| 1. | *DREB1A/3A* | *DREB1A-174* | 7.5 | Field | 126 spring wheat lines | [43] |
| **b.** | **Days to Maturity** |  |  |  |  |  |
| 1. | *1-FEH-B/6B* | FEH-B-561 | 5.3 | Field | 126 spring wheat lines | [43] |
| **c.** | **Grain filling duration** |  |  |  |  |  |
| 1. | *ERA1-B* | *ERA1B-CIN-185* | 7.1 | Field | 126 spring wheat lines | [43] |
| **d.** | **Final Biomass** |  |  |  |  |  |
| 1. | *DREB1A/3A* | *DREB1A-870* | 7.9 | Field | 126 spring wheat lines | [43] |
| **e.** | **Spikes per square meter** |  |  |  |  |  |
| 1. | *ERA1-B* | *ERA1B-932* | 6.1 | Field | 126 spring wheat lines | [43] |
| **f.** | **Grain weight per spike** |  |  |  |  |  |
| 1. | *ERA1-D* | *ERB1D-240* | 6.7 | Field | 126 spring wheat lines | [43] |
| **g.** | **Flag leaf width** |  |  |  |  |  |
| 1. | *ERA1-D* | *ERB1D-235* | 8.6 | Field | 126 spring wheat lines | [43] |
| 2. | *ERA1-D* | *ERB1D-240* | 3.6 | Field | 126 spring wheat lines | [43] |
| **h.** | **Grain no. per spike** |  |  |  |  |  |
| 1. | *1-FEH-A* | *FEHA-412* | 4.5 | Field | 126 spring wheat lines | [43] |
| **i.** | **Harvest index** |  |  |  |  |  |
| 1. | *ERA1-D* | *ERB1D-1207* | 4.8 | Field | 126 spring wheat lines | [43] |
| **II.** | **NDVI** |  |  |  |  |  |
| 1. | *1-FEH-A* | *FEHA-412* | 5.0 | Field | 126 spring wheat lines | [43] |
| **III.** | **Leaf senescence** |  |  |  |  |  |
| 1. | *ERA1-D* | *ERB1D-241* | 6.3 | Field | 126 spring wheat lines | [43] |
| **IV.** | **Green leaf area** |  |  |  |  |  |
| 1. | *1-FEH-A* | *FEHA-127* | 4.0 | Field | 126 spring wheat lines | [43] |
| 2. | *1-FEH-A* | *FEHA-412* | 4.2 | Field | 126 spring wheat lines | [43] |

**Table S4.** Major QTLs for 13 different agronomic and physiological traits reported in wheat under drought/water stress.

| **S. No.** | **Trait/QTL/Chromosome** | **Asso. Marker** | **Position (cM)** | **PVE** | **Phenotyping (Field/Green House/Pots)** | **Mapping Population (Type)** | **Reference** |
| --- | --- | --- | --- | --- | --- | --- | --- |
| **I.** | **Agronomic traits** |  |  |  |  |  |  |
| **a.** | **Grain yield** |  |  |  |  |  |  |
| 1. | *qGYWD.3B.2* | *gpw7774* | 97.6 | 19.6 | Field | WL711/C306 (RILs) | [12] |
| 2. | *4A* | *wmc420* | 90.4 | 20 | Field | Dharwar Dry/Sitta (RILs) | [4] |
| 3. | *qGYWD.3B.3* | *gwm389* | 125.5 | 21.8 | Field | WL711/C306 (RILs) | [12] |
| 4. | *4A-a* | *gwm397* | 6 | 23.9 | Field | Seri/Babax (RILs) | [6] |
| 5. | *Qdt.ksu-4A* | *XCCGA110* | 10 | 39.9 | Field | Dharwar Dry/Sitta (RILs) | [5] |
| **b.** | **TGW** |  |  |  |  |  |  |
| 1. | *3B* | *barc101* | 86.1 | 45.19 | Field | Oste-Gata/Massara (RIL; Durum) | [20] |
| 2. | *QTgw-7A* | *wmc0283* | 81.2 | 24.7 | Field | Excalibur/Kukri (DH) | [7] |
| 3. | *QTgw-7D-b* | *C29P13* | 12.5 | 21.9 | Field | Seri M82/Babax (RILs) | [3] |
| **c.** | **Grains m-2** |  |  |  |  |  |  |
| 1. | *4A* | *wmc420* | 90.4 | 23 | Field | Dharwar Dry/Sitta (RILS) | [4] |
| 2. | *qGNWD.3B.2* | *gpw7774* | 97.6 | 21.4 | Field | WL711/C306 (RILs) | [12] |
| **d.** | **Days to Heading** |  |  |  |  |  |  |
| 1. | *QDh-7D.b* | *C29-P13* | 12.5 | 22.7 | Field | Seri M82/Babax (RILs) | [3] |
| 2. | *QTth-7A* | *wmc283* | 81.2 | 33.99 | Field | Excalibur/Kukri (DH) | [7] |
| 3. | *QHd.idw-2A.2* | *wmc177* | 46 | 32.2 | Field | Kofa/Svevo (RIL;Durum) | [15] |
| 4. | *2B* | *gwm1249* | 66 | 23.7 | Greenhouse | Langdon/G18-16 (RIL; Durum) | [16] |
| 5. | *7B* | *gwm263* | 20.7 | 42.4 | Greenhouse | Langdon/G18-16 (RIL; Durum) | [16] |
| **e.** | **Days to Maturity** |  |  |  |  |  |  |
| 1. | *QDm-7D.b* | *7D-acc/cat-10* | 2.7 | 22.7 | Field | Seri M82/Babax (RILs) | [3] |
| 2. | *2B* | *gwm1249* | 66 | 23.6 | Greenhouse | Langdon/G18-16 (RIL; Durum) | [16] |
| 3. | *7B* | *gwm263* | 20.76 | 30.1 | Greenhouse | Langdon/G18-16 (RIL; Durum) | [16] |
| **f.** | **Harvest index** |  |  |  |  |  |  |
| 1. | *7B* | *gwm263* | 20.7 | 22.4 | Greenhouse | Langdon/G18-16 (RIL; Durum) | [16] |
| II. | **Physiological traits** |  |  |  |  |  |  |
| **a.** | **Stem Reserve Mobilization** |  |  |  |  |  |  |
| 1. | *QSrm.ipk-2D* | *gwm249a* | 142 | 42.2 | Field | W7984/Opata85 (RIL) | [21] |
| 2. | *QSrm.ipk-5D* | *fbb238b* | 19 | 37.5 | Field | W7984/Opata85 (RIL) | [21] |
| 3. | *QSrm.ipk-7D* | *fbb189b* | 338 | 21 | Field | W7984/Opata85 (RIL) | [21] |
| **b.** | **Coleoptile length** |  |  |  |  |  |  |
| 1. | *4DS* | *Rht-D1* | 6 | 65 | Germination paper in growth chamber | Wangshubai/Wheaton (RIL) | [27] |
| 2. | *4BS* | *csME1* | 46 | 45 | Trays in Growth cabinet | Cranbrook/Halberd (DH) | [25] |
| 3. | *4BS* | *Rht-B1b* | 54.4 | 35.4 | Trays in Growth cabinet | Cranbrook/Halberd (DH) | [26] |
| 4. | *4DL* | *Xgwm194* | 15 | 33 | Germination paper in growth chamber | Wangshubai/Wheaton (RIL) | [27] |
| 5. | *4DS* | *Rht-D1b* | 1.8 | 29 | Trays in Growth cabinet | Sunco/Tasman (DH) | [26] |
| 6. | *4BS* | *Rht-B1b* | 52 | 28.2 | Trays in Growth cabinet | CD87/Katepwa (DH) | [26] |
| 7. | *4DS* | *Rht-D1b* | 1.8 | 27.3 | Trays in Growth cabinet | Kukri/Janz (DH) | [26] |
| 8. | *4BL* | *XksuC2* | 52 | 23 | Trays in Growth cabinet | Cranbrook/Halberd (DH) | [25] |
| 9. | *4BS* | *Rht-B1b* | 12 | 22.5 | Trays in Growth cabinet | Kukri/Janz (DH) | [26] |
| 10. | *5AS* | *XpCAT-mGAC306* | 8 | 22 | Germination paper in growth chamber | Wangshubai/Wheaton (RIL) | [27] |
| 11. | *4BS* | *Rht-B1b* | 13.7 | 20.6 | Trays in Growth cabinet | Sunco/Tasman (DH) | [26] |
| **c.** | **Carbon isotpe discrimation (CID)** |  |  |  |  |  |  |
| 1. | *5B* | *gwm408* | 109.8 | 27.4 | Greenhouse | Langdon/G18-16 (RIL; Durum) | [16] |
| 2. | *5B* | *gwm814* | 135.5 | 27.4 | Greenhouse | Langdon/G18-16 (RIL; Durum) | [16] |
| **d.** | **Water souluble carbohydrated** |  |  |  |  |  |  |
| 1. | *QWsc-c.aww-3A* | *WMC0388A* | 64.9 | 19 | Field | RAC875/Kukri (DH) | [9] |
| 2. | *2DS* | *ppd1* | 48 | 30 | Field | Cranbrook/Halberd (DH) | [31] |
| 3. | *2DS* | *ppd1* | 57 | 28 | Field | CD87/Katepwa (DH) | [31] |
| **e.** | **SPAD/chlorophyll content** |  |  |  |  |  |  |
| 1. | *Qchl.ksu-3B* | *barc68* | 67.2 | 59.1 | Greenhouse/Growth chamber | C306/HUW206 (RIL) | [33] |
| 2. | *QFv/Fm.Ksu-3B* | *barc68* | N/A | 56.1 | Greenhouse/Growth chamber | C306/HUW206 (RIL) | [33] |
| 3. | *2A* | *Srap14* | 12.6 | 53 | Field | Pavon76/Yecora Rojo (RIL) | [34] |
| 4. | *Qchl.ksu-2B* | *gwm356* | N/A | 50.1 | Greenhouse/Growth chamber | C306/HUW206 (RIL) | [33] |
| 5. | *3B* | *Srap15* | 10.4 | 50 | Field | Pavon76/Yecora Rojo (RIL) | [34] |
| 6. | *QFv/Fm.Ksu-2B* | *cfa175* | N/A | 46.5 | Greenhouse/Growth chamber | C306/HUW206 (RIL) | [33] |
| 7. | *QFv/Fm.Ksu-4D* | *cfa285* | N/A | 46.4 | Greenhouse/Growth chamber | C306/HUW206 (RIL) | [33] |
| 8. | *1D* | *Srap59* | 22.7 | 46 | Field | Pavon76/Yecora Rojo (RIL) | [34] |
| 9. | *Qchl.ksu-4B* | *cfa349* | N/A | 45.2 | Greenhouse/Growth chamber | C306/HUW206 (RIL) | [33] |
| 10. | *2A* | *Srap11* | 14.9 | 42 | Field | Pavon76/Yecora Rojo (RIL) | [34] |
| 11. | *QFv/Fm.Ksu-4B* | *cfa349* | N/A | 39.8 | Greenhouse/Growth chamber | C306/HUW206 (RIL) | [33] |
| 12. | *7A* | *Srap54* | 20.4 | 38 | Field | Pavon76/Yecora Rojo (RIL) | [34] |
| 13. | *Qchl.ksu-3A* | *barc12* | N/A | 30.5 | Greenhouse/Growth chamber | C306/HUW206 (RIL) | [33] |
| 14. | *QFv/Fm.Ksu-3A* | *barc12* | N/A | 20.4 | Greenhouse/Growth chamber | C306/HUW206 (RIL) | [33] |
| **f.** | ***Cell membrane stability*** |  |  |  |  |  |  |
| 1. | *2A* | *Srap8* | 22.5 | 44 | Field | Pavon76/Yecora Rojo (RIL) | [34] |
| 2. | *3B* | *Srap26* | 22.9 | 31 | Field | Pavon76/Yecora Rojo (RIL) | [34] |
| 3. | *1D* | *Srap64* | 9.5 | 38 | Field | Pavon76/Yecora Rojo (RIL) | [34] |
| 4. | *1B* | *Srap75* | 20.7 | 41 | Field | Pavon76/Yecora Rojo (RIL) | [34] |
| 5. | *5A* | *Srap85* | 16.5 | 25 | Field | Pavon76/Yecora Rojo (RIL) | [34] |
| **g.** | **Abscisic acid (ABA) accumulation** |  |  |  |  |  |  |
| 1. | 3A | *Barc45* | 22.1 | 31 | Field | Pavon76/Yecora Rojo | [38] |
| 2. | 5A | *Srap89* | 15.6 | 30 | Field | Pavon76/Yecora Rojo | [38] |
| 3. | 5A | *Barc10* | 19.8 | 27 | Field | Pavon76/Yecora Rojo | [38] |
| 4. | 4A | *Wmc96* | 16.1 | 26 | Field | Pavon76/Yecora Rojo | [38] |
| 5. | 5A | *Trap9* | 13.5 | 26 | Field | Pavon76/Yecora Rojo | [38] |
| 6. | 5A | *Trap14* | 17.2 | 25 | Field | Pavon76/Yecora Rojo | [38] |
| 7. | 5A | *Srap95* | 19 | 24 | Field | Pavon76/Yecora Rojo | [38] |
| 8. | 4A | *Trap1* | 21.7 | 22 | Field | Pavon76/Yecora Rojo | [38] |
| 9. | 5A | *Srap93* | 20.2 | 22 | Field | Pavon76/Yecora Rojo | [38] |
| 10. | 7B | *Barc72* | 17.3 | 22 | Field | Pavon76/Yecora Rojo | [38] |
| 11. | 4A | *Barc52* | 17.5 | 21 | Field | Pavon76/Yecora Rojo | [38] |

**Table S5.** QTLs for different traits involved in epistatic interactions in wheat under drought.

| **S. No.** | ***Trait/QTL_i/Chromosome*** | **Linked Marker** | **Position (cM)** | ***QTL_j/Chromosome*** | **Linked Marker** | **Position (cM)** | **PVE** | **Phenotyping (Field/Green House/Pots)** | **Mapping Population (Type)** | **Reference** |
| --- | --- | --- | --- | --- | --- | --- | --- | --- | --- | --- |
| **I.** | **Grain yield** |  |  |  |  |  |  |  |  |  |
| 1. | *QYld.idw-2B* | *gwm1027* | 155.0 | *QYld.idw-3B* | *barc133* | 08.0 | N/A | Field | Kofa/Svevo (RIL;Durum) | [15] |
| 2. | *qGYWD.3B.1* | *cfp56* | 87.8 | *qGYWD.3B.2* | *gpw7774* | 97.6 | 0.51 | Field | WL711/C306 (RILs) | [12] |
| 3. | *5D* | *GDM68* | N/A | *7B* | *WMC273* | N/A | N/A | Field | Hanxuan 10 /Lumai 14 (DH) | [13] |
| 4. | *6B* | *P4232.1* | 208.3 | *7A* | *GDM382* | N/A | N/A | Field | Hanxuan 10 /Lumai 14 (DH) | [13] |
| **II** | **Days to Anthesis** |  |  |  |  |  |  |  |  |  |
| 1. | *qDTF.1A.1* | *wmc254* | 151.0 | *qDTF.4B.1* | *wmc47* | 82.0 | N/A | PVC pipes | WL711/C306 (RILs) | [11] |
| 2. | *qDTF.4A.1* | *cfa2026* | 0.5 | *qDTF.7D.1* | *cfd46* | 44.0 | N/A | PVC pipes | WL711/C306 (RILs) | [11] |
| 3. | *QDa.ccsu-1A.1* | *gwm0558* | 32.3 | *QDa.ccsu-5A.2* | *wPt-8226* | 48.5 | 0.3 | Field | Excalibur/Kukri (DH) | [44] |
| 4. | *QDa.ccsu-1A.2* | *wPt-6455* | 39.7 | *QDa.ccsu-3B.2* | *gwm0383* | 39.8 | 0.4 | Field | Excalibur/Kukri (DH) | [44] |
| 5. | *QDa.ccsu-1B.2* | *wPt-2526* | 54.2 | *QDa.ccsu-1D.1* | *ksm0117D* | 07.0 | 1.36 | Field | Excalibur/Kukri (DH) | [44] |
| 6. | *QDa.ccsu-2A.2* | *barc1138* | 8.6 | *QDa.ccsu-7A.2* | *wPt-7299* | 55.0 | 0.6 | Field | Excalibur/Kukri (DH) | [44] |
| 7. | *QDa.ccsu-3A.1* | *wPt-7992* | 4.6 | *QDa.ccsu-7B* | *wPt-2305* | 13.9 | 0.31 | Field | Excalibur/Kukri (DH) | [44] |
| 8. | *QDa.ccsu-3A.2* | *stm0018tgag* | 31.2 | *QDa.ccsu-3B.3* | *gwm0108-3B* | 45.0 | 1.15 | Field | Excalibur/Kukri (DH) | [44] |
| 9. | *QDa.ccsu-4A.1* | *wPt-7001* | 6.7 | *QDa.ccsu-5A.4* | *Vrn-A1* | 70.2 | 1.01 | Field | Excalibur/Kukri (DH) | [44] |
| 10. | *QDa.ccsu-4D* | *wmc0457* | 2.0 | *QDa.ccsu-5B* | *barc0112* | 08.1 | 1.15 | Field | Excalibur/Kukri (DH) | [44] |
| 11. | *QDa.ccsu-7D* | *wPt-5049* | 0.5 | *QDa.ccsu-7D.2* | *cfd0021D* | 41.9 | 0.84 | Field | Excalibur/Kukri (DH) | [44] |
| 12. | *qDTFWD.2D.1* | *barc168* | 55.3 | *qDTFWD.3B.1* | *cfp56* | 87.8 | 0.27 | Field | WL711/C306 (RILs) | [12] |
| **III.** | **TGW** |  |  |  |  |  |  |  |  |  |
| 1. | *QTgw.ccsu-3A* | *cfa2170* | 59.3 | *QTgw.ccsu-3B.1* | *wPt-0302* | 08.4 | 0.67 | Field | Excalibur/Kukri (DH) | [44] |
| 2. | *QTgw.ccsu-3D* | *cfd0223* | 45.7 | *QTgw.ccsu-7B.1* | *gwm0046* | 00.0 | 0.59 | Field | Excalibur/Kukri (DH) | [44] |
| 3. | *QTgw.ccsu-4A.2* | *wPt-2983* | 59 | *QTgw.ccsu-7D.2* | *stm0789tcacD* | 47 | 0.83 | Field | Excalibur/Kukri (DH) | [44] |
| 4. | *QTgw.ccsu-4A.5* | *wPt-2951* | 68.8 | *QTgw.ccsu-6B.2* | *stm0564acag* | 41.3 | 0.72 | Field | Excalibur/Kukri (DH) | [44] |
| 5. | *qTGWWD.1D.1* | *cfd61* | 3.0 | *qTGWWD.3B.1* | *cfp56* | 87.8 | 0.64 | Field | WL711/C306 (RILs) | [12] |
| 6. | *QTgwg.cgb-1B* | *P3622-280* | 0.0 | *QTgwg.cgb-5A* | *WMC524* | 00.0 | 5.16 | Feild | Hanxuan 10 /Lumai 14 (DH) | [19] |
| 7. | *QTgwg.cgb-2A.2* | *gwm122* | 4.0 | *QTgwg.cgb-2B* | *WMC474* | 00.0 | 4.49 | Feild | Hanxuan 10 /Lumai 14 (DH) | [19] |
| 8. | *QTgwg.cgb-3A.1* | *EST47* | 0.0 | *QTgwg.cgb-3A.2* | *WMC532* | 01.0 | 2.97 | Feild | Hanxuan 10 /Lumai 14 (DH) | [19] |
| 9. | *QTgwg.cgb-4A.2* | *CWM145* | 9.0 | *QTgwg.cgb-4A.3* | *P4232-260* | 03.0 | 8.26 | Feild | Hanxuan 10 /Lumai 14 (DH) | [19] |
| 10. | *QTgwg.cgb-6A.2* | *Xgwm334* | 0.0 | *QTgwg.cgb-6A.3* | *P3474-260* | 02.0 | 5.79 | Feild | Hanxuan 10 /Lumai 14 (DH) | [19] |
| 11. | *QTgwg.cgb-6A.4* | *WMC179.1* | 21.0 | *QTgwg.cgb-6A.4* | *P3465-460* | 04.0 | 5.09 | Feild | Hanxuan 10 /Lumai 14 (DH) | [19] |
| 12. | *QTgwm.cgb-2A* | *P3613-170* | 5.0 | *QTgwm.cgb-3B.3* | *Xgwm299* | 01.0 | 4.1 | Feild | Hanxuan 10 /Lumai 14 (DH) | [19] |
| 13. | *QTgwm.cgb-2B.1* | *P6411-216* | 0.0 | *QTgwm.cgb-7B.4* | *WMC276* | 01.0 | 6.61 | Feild | Hanxuan 10 /Lumai 14 (DH) | [19] |
| 14. | *QTgwm.cgb-2B.2* | *WMC344* | 2.0 | *QTgwm.cgb-3B.4* | *Xgwm340* | 02.0 | 4.09 | Feild | Hanxuan 10 /Lumai 14 (DH) | [19] |
| 15. | *QTgwm.cgb-2D.2* | *WMC181* | 0.0 | *QTgwm.cgb-7D* | *Xgwm44* | 07.0 | 3.93 | Feild | Hanxuan 10/Lumai 14 (DH) | [19] |
| 16. | *QTgwm.cgb-3A.1* | *P3614-280* | 0.0 | *QTgwm.cgb-7A.2* | *CWM462.2* | 00.0 | 2.75 | Feild | Hanxuan 10 /Lumai 14 (DH) | [19] |
| 17. | *QTgwm.cgb-3B.1* | *P3622-400* | 0.0 | *QTgwm.cgb-4A.1* | *P3446-205* | 01.0 | 2.12 | Feild | Hanxuan 10 /Lumai 14 (DH) | [19] |
| 18. | *QTgwm.cgb-3B.2* | *P2478-155* | 0.0 | *QTgwm.cgb-7B.3* | *Xgwm297* | 16.0 | 3.22 | Feild | Hanxuan 10 /Lumai 14 (DH) | [19] |
| 19. | *QTgwm.cgb-4A.2* | *P5611-136* | 4.0 | *QTgwm.cgb-7B.2* | *WMC526* | 02.0 | 2.31 | Feild | Hanxuan 10 /Lumai 14 (DH) | [19] |
| 20. | *QTgwm.cgb-4D* | *gwm192* | 24.0 | *QTgwm.cgb-7B.1* | *P6401-238* | 25.0 | 1.25 | Feild | Hanxuan 10 /Lumai 14 (DH) | [19] |
| 21. | *QTgwm.cgb-6A.3* | *P4232-400* | 33.0 | *QTgwm.cgb-7A.1* | *P3465-175* | 07.0 | 1.86 | Feild | Hanxuan 10 /Lumai 14 (DH) | [19] |
| 22. | *QTgwm.cgb-6B.1* | *gwm219* | 0.0 | *QTgwm.cgb-6B.2* | *P3470-210* | 21.0 | 1.2 | Feild | Hanxuan 10 /Lumai 14 (DH) | [19] |
| 23. | *2A* | *P2478.2* | N/A | *2B* | *GWM388* | N/A | N/A | Field | Hanxuan 10 /Lumai 14 (DH) | [13] |
| 24. | *2A* | *P5166.2* | N/A | *2B* | *GWM388* | N/A | N/A | Field | Hanxuan 10 /Lumai 14 (DH) | [13] |
| **IV.** | **Coleoptile length** |  |  |  |  |  |  |  |  |  |
| 1. | *4BS* | *Rht-B1b* | 53.9 | *7BS* | *wmc76* | 66.3 | 2.1 | Growth cabinet | Cranbrook/Halberd (DH) | [26] |
| 2. | *4BS* | *Rht-B1b* | 53.9 | *7BS* | *w-Pt6463* | 80.1 | 1.6 | Growth cabinet | Cranbrook/Halberd (DH) | [26] |
| 3. | *2DL* | *stm55ltgag* | 124.7 | *5BS* | *RGA74.15* | 132.4 | 2.7 | Growth cabinet | Cranbrook/Halberd (DH) | [26] |
| 4. | *1AL* | *bcd310* | 81.1 | *5DS* | *P41/M51-2* | 150.8 | 0.5 | Growth cabinet | CD87/Katepwa (DH) | [26] |
| **V.** | **WSC** |  |  |  |  |  |  |  |  |  |
| 1. | *QSwscf.cgb-1A.2* | *P5522-280* | 0.0 | *QSwscf.cgb-6B* | *WMC417.2* | 14.0 | 2.97 | Feild | Hanxuan 10 /Lumai 14 (DH) | [19] |
| 2. | *QSwscf.cgb-1B.1* | *gwm131* | 0.0 | *QSwscf.cgb-1B.2* | *P1142-430* | 2.0 | 1.77 | Feild | Hanxuan 10 /Lumai 14 (DH) | [19] |
| 3. | *QSwscf.cgb-1B.3* | *CWM90* | 0.0 | *QSwscf.cgb-3A.1* | *WMC388* | 0.0 | 0.94 | Feild | Hanxuan 10 /Lumai 14 (DH) | [19] |
| 4. | *QSwscf.cgb-2B* | *P4233-160* | 2.0 | *QSwscf.cgb-5A.1* | *Xgwm410* | 7.0 | 1.73 | Feild | Hanxuan 10 /Lumai 14 (DH) | [19] |
| 5. | *QSwscf.cgb-2D.2* | *WMC41* | 0.0 | *QSwscf.cgb-2D.3* | *WMC181* | 8.0 | 0.84 | Feild | Hanxuan 10 /Lumai 14 (DH) | [19] |
| 6. | *QSwscf.cgb-3A.2* | *WMC21* | 0.0 | *QSwscf.cgb-5A.2* | *P2470-280* | 0.0 | 1.09 | Feild | Hanxuan 10 /Lumai 14 (DH) | [19] |
| 7. | *QSwscf.cgb-3B* | *CWM539.1* | 0.0 | *QSwscf.cgb-7B.2* | *P1123-235* | 5.0 | 0.88 | Feild | Hanxuan 10 /Lumai 14 (DH) | [19] |
| 8. | *QSwscf.cgb-3D* | *WMC437* | 15.0 | *QSwscf.cgb-5B* | *Xgwm371* | 3.0 | 2.63 | Feild | Hanxuan 10 /Lumai 14 (DH) | [19] |
| 9. | *QSwscf.cgb-7B.1* | *CWM467* | 0.0 | *QSwscf.cgb-7B.3* | *Xgwm611* | 6.0 | 2.42 | Feild | Hanxuan 10 /Lumai 14 (DH) | [19] |
| 10. | *QSwscg.cgb-1B* | *gwm268* | 22.0 | *QSwscg.cgb-7A.1* | *Xgwm635.2* | 0.0 | 1.78 | Feild | Hanxuan 10 /Lumai 14 (DH) | [19] |
| 11. | *QSwscg.cgb-1D* | *CWM1* | 0.0 | *QSwscg.cgb-3B* | *P3716-150* | 0.0 | 2 | Feild | Hanxuan 10 /Lumai 14 (DH) | [19] |
| 12. | *QSwscg.cgb-2A.1* | *P1138-490* | 1.0 | *QSwscg.cgb-6A.1* | *P3465-460* | 18.0 | 2.24 | Feild | Hanxuan 10 /Lumai 14 (DH) | [19] |
| 13. | *QSwscg.cgb-2A.2* | *P3613-170* | 0.0 | *QSwscg.cgb-7A.2* | *WMC301* | 15.0 | 4.01 | Feild | Hanxuan 10 /Lumai 14 (DH) | [19] |
| 14. | *QSwscg.cgb-2B* | *WMC441* | 5.0 | *QSwscg.cgb-6B* | *WMC182* | 0.0 | 5.61 | Feild | Hanxuan 10 /Lumai 14 (DH) | [19] |
| 15. | *QSwscg.cgb-3B* | *gwm547* | 0.0 | *QSwscg.cgb-7A.3* | *P3156-360* | 0.0 | 2.46 | Feild | Hanxuan 10 /Lumai 14 (DH) | [19] |
| 16. | *QSwscg.cgb-6A.2* | *EST25* | 0.0 | *QSwscg.cgb-7A.4* | *CWM48.2* | 0.0 | 3.25 | Feild | Hanxuan 10 /Lumai 14 (DH) | [19] |
| 17. | *QSwscm.cgb-1A.2* | *WMC20* | 3.0 | *QSwscm.cgb-4A* | *CWM145* | 18.0 | 4.71 | Feild | Hanxuan 10 /Lumai 14 (DH) | [19] |
| 18. | *QSwscm.cgb-1B.1* | *P4133-170* | 4.0 | *QSwscm.cgb-1B.2* | *WMC156* | 0.0 | 1.65 | Feild | Hanxuan 10 /Lumai 14 (DH) | [19] |
| 19. | *QSwscm.cgb-2A.1* | *gwm68.2* | 0.0 | *QSwscm.cgb-6D* | *Xgwm325* | 0.0 | 3.09 | Feild | Hanxuan 10 /Lumai 14 (DH) | [19] |
| 20. | *QSwscm.cgb-2A.2* | *psp3088* | 5.0 | *QSwscm.cgb-5A.2* | *Xgwm595* | 0.0 | 3.42 | Feild | Hanxuan 10 /Lumai 14 (DH) | [19] |
| 21. | *QSwscm.cgb-2B.2* | *P3470-245* | 5.0 | *QSwscm.cgb-3B.2* | *P2449-185* | 19.0 | 1.52 | Feild | Hanxuan 10 /Lumai 14 (DH) | [19] |
| 22. | *QSwscm.cgb-3B.1* | *P3156-185* | 6.0 | *QSwscm.cgb-5B* | *Xgwm67* | 0.0 | 3.82 | Feild | Hanxuan 10 /Lumai 14 (DH) | [19] |
| 23. | *QSwscm.cgb-5A.1* | *P3616-185* | 10.0 | *QSwscm.cgb-7B* | *Xpsp3033* | 8.0 | 4.79 | Feild | Hanxuan 10 /Lumai 14 (DH) | [19] |
| 24. | *QSwscm.cgb-6B.1* | *gwm219* | 0.0 | *QSwscm.cgb-6B.2* | *P3470-210* | 9.0 | 2.79 | Feild | Hanxuan 10 /Lumai 14 (DH) | [19] |
| **VI.** | **CID** |  |  |  |  |  |  |  |  |  |
| 1. | *1A* | *P3156.2* | N/A | *2B* | *wmc344* | N/A | N/A | Field | Hanxuan 10 /Lumai 14 (DH) | [13] |
| 2. | *3B* | *P6431.2* | N/A | *7B* | *wmc526* | 77.1 | N/A | Field | Hanxuan 10 /Lumai 14 (DH) | [13] |
| **VII.** | **SPAD/chlorophyll content** |  |  |  |  |  |  |  |  |  |
| 1. | *Qspad.acs-1A.3* | *gwm357* | N/A | *Qspad.acs-4D.2* | *Xwmc48* | N/A | 1.91 | Field | Longjian 19/Q9086 (RIL) | [35] |
| 2. | *Qspad.acs-1A.4* | *gwm33* | N/A | *Qspad.acs-5D.4* | *Xcfd78* | N/A | 1.83 | Field | Longjian 19/Q9086 (RIL) | [35] |
| 3. | *Qspad.acs-1A.5* | *gwm497* | N/A | *Qspad.acs-7B.4* | *Xgwm43* | N/A | 2.2 | Field | Longjian 19/Q9086 (RIL) | [35] |
| 4. | *Qspad.acs-1A.6* | *gwm164* | N/A | *Qspad.acs-4D.3* | *Xwmc399* | N/A | 1.56 | Field | Longjian 19/Q9086 (RIL) | [35] |
| 5. | *Qspad.acs-1A.7* | *ksum41* | N/A | *Qspad.acs-3D.2* | *Xgwm456* | N/A | 1.61 | Field | Longjian 19/Q9086 (RIL) | [35] |
| 6. | *Qspad.acs-1D* | *wmc216* | N/A | *Qspad.acs-2D.4* | *Xgwm484* | N/A | 1.63 | Field | Longjian 19/Q9086 (RIL) | [35] |
| 7. | *Qspad.acs-2A.7* | *gwm512* | N/A | *Qspad.acs-4B.4* | *Xgwm251* | N/A | 2.22 | Field | Longjian 19/Q9086 (RIL) | [35] |
| 8. | *Qspad.acs-2A.8* | *gwm515* | N/A | *Qspad.acs-7A.3* | *Xbarc1167* | N/A | 2.03 | Field | Longjian 19/Q9086 (RIL) | [35] |
| 9. | *Qspad.acs-2A.9* | *mag3253* | N/A | *Qspad.acs-3D.2* | *Xgwm456* | N/A | 1.13 | Field | Longjian 19/Q9086 (RIL) | [35] |
| 10. | *Qspad.acs-2B.5* | *gdm87* | N/A | *Qspad.acs-2D.5* | *Xbarc95* | N/A | 1.86 | Field | Longjian 19/Q9086 (RIL) | [35] |
| 11. | *Qspad.acs-2B.6* | *mag3319* | N/A | *Qspad.acs-2D.6* | *Xgwm349* | N/A | 1.72 | Field | Longjian 19/Q9086 (RIL) | [35] |
| 12. | *Qspad.acs-2B.7* | *gwm630* | N/A | *Qspad.acs-3A.6* | *Xbarc1113* | N/A | 1.24 | Field | Longjian 19/Q9086 (RIL) | [35] |
| 13. | *Qspad.acs-2D.1* | *barc95* | N/A | *Qspad.acs-3B.9* | *Xgwm108* | N/A | 1.68 | Field | Longjian 19/Q9086 (RIL) | [35] |
| 14. | *Qspad.acs-2D.2* | *gwm608* | N/A | *Qspad.acs-6B.6* | *Xgwm273* | N/A | 1.75 | Field | Longjian 19/Q9086 (RIL) | [35] |
| 15. | *Qspad.acs-2D.3* | *cfd62* | N/A | *Qspad.acs-6A.2* | *Xbarc171* | N/A | 3.29 | Field | Longjian 19/Q9086 (RIL) | [35] |
| 16. | *Qspad.acs-3A.1* | *wmc11* | N/A | *Qspad.acs-5D.4* | *Xgwm232* | N/A | 2.22 | Field | Longjian 19/Q9086 (RIL) | [35] |
| 17. | *Qspad.acs-3A.4* | *wmc505* | N/A | *Qspad.acs-6B.6* | *Xgwm273* | N/A | 2.03 | Field | Longjian 19/Q9086 (RIL) | [35] |
| 18. | *Qspad.acs-3A.5* | *cfd193* | N/A | *Qspad.acs-3D.1* | *Xwmc529* | N/A | 1.95 | Field | Longjian 19/Q9086 (RIL) | [35] |
| 19. | *Qspad.acs-3A.6* | *barc1113* | N/A | *Qspad.acs-5D.5* | *Xwmc212* | N/A | 2.24 | Field | Longjian 19/Q9086 (RIL) | [35] |
| 20. | *Qspad.acs-3B.4* | *psp3144* | N/A | *Qspad.acs-7A.3* | *Xbarc1167* | N/A | 1.62 | Field | Longjian 19/Q9086 (RIL) | [35] |
| 21. | *Qspad.acs-3B.5* | *wmc51* | N/A | *Qspad.acs-3D.2* | *Xgwm456* | N/A | 1.7 | Field | Longjian 19/Q9086 (RIL) | [35] |
| 22. | *Qspad.acs-3B.6* | *gwm181* | N/A | *Qspad.acs-4D.3* | *Xwmc399* | N/A | 1.9 | Field | Longjian 19/Q9086 (RIL) | [35] |
| 23. | *Qspad.acs-3B.7* | *ksum45* | N/A | *Qspad.acs-6B.6* | *Xgwm70* | N/A | 2.03 | Field | Longjian 19/Q9086 (RIL) | [35] |
| 24. | *Qspad.acs-3B.8* | *wmc231* | N/A | *Qspad.acs-7B.5* | *Xbarc72* | N/A | 1.71 | Field | Longjian 19/Q9086 (RIL) | [35] |
| 25. | *Qspad.acs-3D.1* | *wmc529* | N/A | *Qspad.acs-6A.3* | *Xwmc580* | N/A | 1.4 | Field | Longjian 19/Q9086 (RIL) | [35] |
| 26. | *Qspad.acs-3D.2* | *gwm314* | N/A | *Qspad.acs-6A.5* | *Xwmc179* | N/A | 2.6 | Field | Longjian 19/Q9086 (RIL) | [35] |
| 27. | *Qspad.acs-4A.2* | *mag3733* | N/A | *Qspad.acs-4A.3* | *Xgwm637* | N/A | 1.24 | Field | Longjian 19/Q9086 (RIL) | [35] |
| 28. | *Qspad.acs-4B.4* | *gwm495* | N/A | *Qspad.acs-4D.1* | *Xgdm125* | N/A | 1.85 | Field | Longjian 19/Q9086 (RIL) | [35] |
| 29. | *Qspad.acs-4D.1* | *wmc457* | N/A | *Qspad.acs-7A.4* | *Xgwm60* | N/A | 1.71 | Field | Longjian 19/Q9086 (RIL) | [35] |
| 30. | *Qspad.acs-5B.5* | *gdm116* | N/A | *Qspad.acs-7B.6* | *Xgwm68* | N/A | 2.45 | Field | Longjian 19/Q9086 .(RIL) | [35] |
| 31. | *Qspad.acs-5B.6* | *gwm335* | N/A | *Qspad.acs-5B.7* | *Xbarc308* | N/A | 1.48 | Field | Longjian 19/Q9086 (RIL) | [35] |
| 32. | *Qspad.acs-5D.2* | *gwm232* | N/A | *Qspad.acs-7A.5* | *Xwmc422* | N/A | 1.75 | Field | Longjian 19/Q9086 (RIL) | [35] |
| 33. | *Qspad.acs-5D.3* | *gdm138* | N/A | *Qspad.acs-6A.4* | *Xwmc621* | N/A | 2.09 | Field | Longjian 19/Q9086 (RIL) | [35] |
| 34. | *Qspad.acs-6A.1* | *wmc684* | N/A | *Qspad.acs-7B.5* | *Xbarc72* | N/A | 2.33 | Field | Longjian 19/Q9086 (RIL) | [35] |
| 35. | *Qspad.acs-6B.2* | *wmc737* | N/A | *Qspad.acs-7B.7* | *Xbarc65* | N/A | 2.21 | Field | Longjian 19/Q9086 (RIL) | [35] |
| 36. | *Qspad.acs-6B.4* | *mag1266* | N/A | *Qspad.acs-7B.7* | *Xbarc65* | N/A | 1.83 | Field | Longjian 19/Q9086 (RIL) | [35] |
| 37. | *Qspad.acs-6B.5* | *gwm508* | N/A | *Qspad.acs-6B.1* | Xmag1378 | N/A | 3.11 | Field | Longjian 19/Q9086 (RIL) | [35] |
| 38. | *Qspad.acs-6D* | *wmc469* | N/A | *Qspad.acs-7D.4* | Xgwm37 | N/A | 2.1 | Field | Longjian 19/Q9086 (RIL) | [35] |

**Table S6.** TF/TCS genes that were mapped on 16 wheat chromosomes/arms known to harbor major QTLs for drought tolerance in wheat.

| **S. No.** | **Chrom.** | **Trait** | **QTL** | **Linked Marker** | **Position (cM)** | **PVE** | **Reference** | **Drought Related Genes on Same Chromosomes** |
| --- | --- | --- | --- | --- | --- | --- | --- | --- |
| 1. | 1B | CMS | *1B* | *Srap75* | 20.7 | 41 | [34] | WLIP19 |
| 2. | 1D | SPAD/chlorophyll content | *1D* | *Srap59* | 22.7 | 46 | [34] | WDREB2, TaPIMP1 |
| 3. | 1D | CMS | *1D* | *Srap64* | 9.5 | 38 | [34] |  |
| 4. | 2A | DTH | *QHd.idw-2A.2* | *wmc177* | 46 | 32.2 | [15] | TaRRA1, TaRRA12, TaERF1, TaMYB2A |
| 5. | 2A | SPAD/chlorophyll content | *2A* | *Srap14* | 12.6 | 53 | [34] |  |
| 6. | 2A | SPAD/chlorophyll content | *2A* | *Srap11* | 14.9 | 42 | [34] |  |
| 7. | 2A | CMS | *2A* | *Srap8* | 22.5 | 44 | [34] |  |
| 8. | 2B | DTH, DTM | *2B* | *gwm1249* | 66 | 23.6–23.7 | [16] | TaRRA1, TaNAC29, TaWRKY19, TaWRKY20 |
| 9. | 2B | SPAD/chlorophyll content | *Qchl.ksu-2B* | *gwm356* | N/A | 50.1 | [33] |  |
| 10. | 2B | SPAD/chlorophyll content | *QFv/Fm.Ksu-2B* | *cfa175* | N/A | 46.5 | [33] |  |
| 11. | 2D | SRM | *QSrm.ipk-2D* | *gwm249a* | 142 | 42.2 | [21] | TaSNAC1, TaNAC2, TaNAC69, TaWRKY2 |
| 12. | 2DS | WSC | *2DS* | *ppd1* | 48 | 30 | [31] |  |
| 13. | 3A | WSC | *QWsc-c.aww-3A* | *wmc0388A* | 64.9 | 19 | [9] | TaDREB1 |
| 14. | 3A | SPAD/chlorophyll content | *Qchl.ksu-3A* | *barc12* | N/A | 30.5 | [33] |  |
| 15. | 3A | SPAD/chlorophyll content | *QFv/Fm.Ksu-3A* | *barc12* | N/A | 20.4 | [33] |  |
| 16. | 3A | ABA accumnlation | *3A* | *barc45* | 22.1 | 31 | [38] |  |
| 17. | 3B | GY | *qGYWD.3B.2* | *gpw7774* | 97.6 | 19.6 | [12] | TaABP1, TaWRKY10 |
| 18. | 3B | GY | *qGYWD.3B.3* | *gwm389* | 125.5 | 21.8 | [12] |  |
| 19. | 3B | TGW | *3B* | *barc101* | 86.1 | 45.19 | [20] |  |
| 20. | 3B | Grains m-2 | *qGNWD.3B.2* | *gpw7774* | 97.6 | 21.4 | [12] |  |
| 21. | 3B | SPAD/chlorophyll content | *Qchl.ksu-3B* | *barc68* | 67.2 | 59.1 | [33] |  |
| 22. | 3B | SPAD/chlorophyll content | *QFv/Fm.Ksu-3B* | *barc68* | N/A | 56.1 | [33] |  |
| 23. | 3B | SPAD/chlorophyll content | *3B* | *Srap15* | 10.4 | 50 | [34] |  |
| 24. | 3B | CMS | *3B* | *Srap26* | 22.9 | 31 | [34] |  |
| 25. | 4A | GY, Grains m-2 | *4A* | *wmc420* | 90.4 | 20-23 | [4] | TaCHK1, TaERS1, TaWRKY12, TaWRKY16 |
| 26. | 4A | GY | *4A-a* | *gwm397* | 6 | 23.9 | [6] |  |
| 27. | 4A | GY | *Qdt.ksu-4A* | *CCGA110* | 10 | 39.9 | [5] |  |
| 28. | 4A | ABA accumnlation | *4A* | *Wmc96* | 16.1 | 26 | [38] |  |
| 29. | 4A | ABA accumnlation | *4A* | *Trap1* | 21.7 | 22 | [38] |  |
| 30. | 4A | ABA accumnlation | *4A* | *Barc52* | 17.5 | 21 | [38] |  |
| 31. | 4B | SPAD/chlorophyll content | *Qchl.ksu-4B* | *cfa349* | N/A | 45.2 | [33] | TaCHK1, TaERS1, TaHPT6, TaWRKY44 |
| 32. | 4B | SPAD/chlorophyll content | *QFv/Fm.Ksu-4B* | *cfa349* | N/A | 39.8 | [33] |  |
| 33. | 4BL | CL | *4BL* | *ksuC2* | 52 | 23 | [25] |  |
| 34. | 4BS | CL | *4BS* | *csME1* | 46 | 45 | [25] |  |
| 35. | 4BS | CL | *4BS* | *Rht-B1b* | 54.4 | 35.4 | [26] |  |
| 36. | 4D | SPAD/chlorophyll content | *QFv/Fm.Ksu-4D* | *cfa285* | N/A | 46.4 | [33] | TaCHK1, TaERS1, |
| 37. | 4DL | CL | *4DL* | *gwm194* | 15 | 33 | [27] |  |
| 38. | 4DS | CL | *4DS* | *Rht-D1* | 6 | 65 | [27] |  |
| 39. | 4DS | CL | *4DS* | *Rht-D1b* | 1.8 | 29 | [26] |  |
| 40. | 5A | CMS | *5A* | *Srap85* | 16.5 | 25 | [34] | TaRRA29, TaPRR1 |
| 41. | 5A | ABA accumnlation | *5A* | *Srap89* | 15.6 | 30 | [38] |  |
| 42. | 5A | ABA accumnlation | *5A* | *Barc10* | 19.8 | 27 | [38] |  |
| 43. | 5A | ABA accumnlation | *5A* | *Trap9* | 13.5 | 26 | [38] |  |
| 44. | 5A | ABA accumnlation | *5A* | *Trap14* | 17.2 | 25 | [38] |  |
| 45. | 5A | ABA accumnlation | *5A* | *Srap95* | 19 | 24 | [38] |  |
| 46. | 5A | ABA accumnlation | *5A* | *Srap93* | 20.2 | 22 | [38] |  |
| 47. | 5AS | CL | *5AS* | pCAT-mGAC306 | 8 | 22 | [27] |  |
| 48. | 5B | CID | *5B* | *gwm814* | 135.5 | 27.4 | [16] | TaHPT3, TaRRA41, TaPRR1, WCBF2, TaNAC4, TaNAC8 |
| 49. | 5D | SRM | *QSrm.ipk-5D* | *fbb238b* | 19 | 37.5 | [21] | TabZIP1, TaWRKY59, TaWRKY61 |
| 50. | 7A | TGW, DTH | *QTgw-7A, QTth-7A* | *wmc0283* | 81.2 | 24.7-33.9 | [7] | TaRRB1, TaWRKY82, TaTEF |
| 51. | 7A | SPAD/chlorophyll content | *7A* | *Srap54* | 20.4 | 38 | [34] |  |
| 52. | 7B | DTH, DTM, HI | *7B* | *gwm263* | 20 | 22- 42.4 | [16] | TaRRB1 |
| 53. | 7B | ABA accumnlation | *7B* | *Barc72* | 17.3 | 22 | [38] |  |
| 54. | 7D | TGW, DTH | *QTgw-7D-b, QDh-7D.b* | C29P13 | 12.5 | 21.9-22.7 | [3] | TaRRB1, TaWRKY17, TaWRKY60 |
| 55. | 7D | DTM | *QDm-7D.b* | 7D-acc/cat-10 | 2.7 | 22.7 | [3] |  |
| 56. | 7D | SRM | *QSrm.ipk-7D* | *fbb189b* | 338 | 21 | [21] |  |

References

1. Quarrie, S.A.; Pekic Quarrie, S.; Radosevic, R.; Rancic, D.; Kaminska, A.; Barnes, J.D.; Leverington, M.; Ceoloni, C.; Dodig, D. Dissecting a wheat QTL for yield present in a range of environments: From the QTL to candidate genes. *J. Exp. Bot.* **2006**, *57*, 2627–2637.
2. Maphosa, L.; Langridge, P.; Taylor, H.; Parent, B.; Emebiri, L.C.; Kuchel, H.; Reynolds, M.P.; Chalmers, K.J.; Okada, A.; Edwards, J.; et al. Genetic control of grain yield and grain physical characteristics in a bread wheat population grown under a range of environmental conditions. *Theor. Appl. Genet.* **2014**, *127*, 1607–1624.
3. Lopes, M.S.; Reynolds, M.P.; McIntyre, C.L.; Mathews, K.L.; Jalal Kamali, M.R.; Mossad, M.; Feltaous, Y.; Tahir, I.S.A.; Chatrath, R.; Ogbonnaya, F.; et al. QTL for yield and associated traits in the Seri/Babax population grown across several environments in Mexico, in the West Asia, North Africa, and South Asia regions. *Theor. Appl. Genet.* **2013**, *126*, 971–984.
4. Kirigwi, F.M.; Van Ginkel, M.; Brown-Guedira, G.; Gill, B.S.; Paulsen, G.M.; Fritz, A.K. Markers associated with a QTL for grain yield in wheat under drought. *Mol. Breed.* **2007**, *20*, 401–413.
5. Alexander, L.M.; Kirigwi, F.M.; Fritz, A.K.; Fellers, J.P. Mapping and quantitative trait loci analysis of drought tolerance in a spring wheat population using amplified fragment length polymorphism and diversity array technology markers. *Crop Sci.* **2012**, *52*, 253–261.
6. Pinto, R.S.; Reynolds, M.P.; Mathews, K.L.; McIntyre, C.L.; Olivares-Villegas, J.J.; Chapman, S.C. Heat and drought adaptive QTL in a wheat population designed to minimize confounding agronomic effects. *Theor. Appl. Genet.* **2010**, *121*, 1001–1021.
7. Hill, C.B.; Taylor, J.D.; Edwards, J.; Mather, D.; Bacic, A.; Langridge, P.; Roessner, U. Whole-genome mapping of agronomic and metabolic traits to identify novel quantitative trait Loci in bread wheat grown in a water-limited environment. *Plant Physiol.* **2013**, *162*, 1266–1281.
8. McIntyre, C.L.; Mathews, K.L.; Rattey, A.; Chapman, S.C.; Drenth, J.; Ghaderi, M.; Reynolds, M.; Shorter, R. Molecular detection of genomic regions associated with grain yield and yield-related components in an elite bread wheat cross evaluated under irrigated and rainfed conditions. *Theor. Appl. Genet.* **2010**, *120*, 527–541.
9. Bennett, D.; Izanloo, A.; Reynolds, M.; Kuchel, H.; Langridge, P.; Schnurbusch, T. Genetic dissection of grain yield and physical grain quality in bread wheat (*Triticum aestivum* L.) under water-limited environments. *Theor. Appl. Genet.* **2012**, *125*, 255–271.
10. Bennett, D.; Reynolds, M.; Mullan, D.; Izanloo, A.; Kuchel, H.; Langridge, P.; Schnurbusch, T. Detection of two major grain yield QTL in bread wheat (*Triticum aestivum* L.) under heat, drought and high yield potential environments. *Theor. Appl. Genet.* **2012**, *125*, 1473–1485.
11. Kadam, S.; Singh, K.; Shukla, S.; Goel, S.; Vikram, P.; Pawar, V. Genomic associations for drought tolerance on the short arm of wheat chromosome 4B. *Funct. Integr. Genom.* **2012**, *12*, 447–464.
12. Shukla, S.; Singh, K.; Patil, R.V.; Kadam, S.; Bharti, S.; Prasad, P.; Singh, N.K.; Khanna-Chopra, R. Genomic regions associated with grain yield under drought stress in wheat (*Triticum aestivum* L.). *Euphytica* **2015**, *203*, 449–467.
13. Wu, X.; Chang, X.; Jing, R. Genetic Analysis of Carbon Isotope Discrimination and its Relation to Yield in a Wheat Doubled Haploid Population. *J. Integr. Plant Biol.* **2011**, *53*, 719–730.
14. Mathews, K.L.; Malosetti, M.; Chapman, S.; McIntyre, L.; Reynolds, M.; Shorter, R.; Van Eeuwijk, F. Multi-environment QTL mixed models for drought stress adaptation in wheat. *Theor. Appl. Genet.* **2008**, *117*, 1077–1091.
15. Maccaferri, M.; Sanguineti, M.C.; Corneti, S.; Ortega, J.L.A.; Salem, M.; Ben Bort, J.; DeAmbrogio, E.; Del Moral, L.F.G.; Demontis, A.; El-Ahmed, A.; et al. Quantitative trait loci for grain yield and adaptation of durum wheat (*Triticum durum* Desf.) across a wide range of water availability. *Genetics* **2008**, *178*, 489–511.
16. Peleg, Z.V.I.; Fahima, T.; Krugman, T.; Abbo, S.; Yakir, D.A.N.; Korol, A.B.; Saranga, Y. Genomic dissection of drought resistance in durum wheat × wild emmer wheat recombinant inbreed line population. *Plant Cell Environ.* **2009**, *32*, 758–779.
17. Verma, V.; Foulkes, M.J.; Worland, A.J.; Sylvester-Bradley, R.; Caligari, P.D.S.; Snape, J.W. Mapping quantitative trait loci for flag leaf senescence as a yield determinant in winter wheat under optimal and drought-stressed environments. *Euphytica* **2004**, *135*, 255–263.
18. Nezhad, Z.K.; Weber, W.E.; Röder, M.S.; Sharma, S.; Lohwasser, U.; Meyer, R.C.; Saal, B.; Börner, A. QTL analysis for thousand-grain weight under terminal drought stress in bread wheat (*Triticum aestivum* L.). *Euphytica* **2012**, *186*, 127–138.
19. Yang, D.L.; Jing, R.L.; Chang, X.P.; Li, W. Identification of quantitative trait loci and environmental interactions for accumulation and remobilization of water-soluble carbohydrates in wheat (*Triticum aestivum* L.) stems. *Genetics* **2007**, *176*, 571–584.
20. Golabadi, M.; Arzani, A.; Mirmohammadi Maibody, S.A.M.; Tabatabaei, B.E.S.; Mohammadi, S.A. Identification of microsatellite markers linked with yield components under drought stress at terminal growth stages in durum wheat. *Euphytica* **2011**, *177*, 207–221.
21. Salem, K.F.M.; Roder, M.S.; Borner, A. Identification and mapping quantitative trait loci for stem reserve mobilisation in Wheat (*Triticum aestivum* L.). *Cereal Res. Commun.* **2007**, *35*, 1367–1374.
22. Zhang, H.; Cui, F.; Wang, L.; Li, J.; Ding, A.; Zhao, C.; Bao, Y.; Yang, Q.; Wang, H. Conditional and unconditional QTL mapping of drought-tolerance-related traits of wheat seedling using two related RIL populations. *J. Genet.* **2013**, *92*, 213–231.
23. Spielmeyer, W.; Hyles, J.; Joaquim, P.; Azanza, F.; Bonnett, D.; Ellis, M.E.; Moore, C.; Richards, R.A. A QTL on chromosome 6A in bread wheat (Triticum aestivum) is associated with longer coleoptiles, greater seedling vigour and final plant height. *Theor. Appl. Genet.* **2007**, *115*, 59–66.
24. Rebetzke, G.J.; Verbyla, A.P.; Verbyla, K.L.; Morell, M.K.; Cavanagh, C.R. Use of a large multiparent wheat mapping population in genomic dissection of coleoptile and seedling growth. *Plant Biotechnol. J.* **2014**, *12*, 219–230.
25. Rebetzke, G.J.; Appels, R.; Morrison, A.D.; Richards, R.A.; McDonald, G.; Ellis, M.H.; Spielmeyer, W.; Bonnett, D.G. Quantitative trait loci on chromosome 4B for coleoptile length and early vigour in wheat (Triticum aestivum L.). *Aust. J. Agric. Res.* **2001**, *52*, 1221–1234.
26. Rebetzke, G.J.; Ellis, M.H.; Bonnett, D.G.; Richards, R.A. Molecular mapping of genes for Coleoptile growth in bread wheat (*Triticum aestivum* L.). *Theor. Appl. Genet.* **2007**, *114*, 1173–1183.
27. Yu, J.B.; Bai, G.H. Mapping quantitative trait loci for long coleoptile in Chinese wheat landrace Wangshuibai. *Crop Sci.* **2010**, *50*, 43–50.
28. Landjeva, S.; Neumann, K.; Lohwasser, U.; Borner, A. Molecular mapping of genomic regions associated with wheat seedling growth under osmotic stress. *Biol. Plant.* **2008**, *52*, 259–266.
29. Diab, A.A.; Kantety, R.V.; Ozturk, N.Z.; Benscher, D.; Nachit, M.M.; Sorrells, M.E. Drought-inducible genes and differentially expressed sequence tags associated with components of drought tolerance in durum wheat. *Sci. Res. Essay* **2008**, *3*, 9–26.
30. Rebetzke, G.J.; Condon, A.G.; Farquhar, G.D.; Appels, R.; Richards, R.A. Quantitative trait loci for carbon isotope discrimination are repeatable across environments and wheat mapping populations. *Theor. Appl. Genet.* **2008**, *118*, 123–137.
31. Rebetzke, G.J.; Van Herwaarden, A.F.; Jenkins, C.; Weiss, M.; Lewis, D.; Ruuska, S.; Tabe, L.; Fettell, N.A.; Richards, R.A. Quantitative trait loci for water-soluble carbohydrates and associations with agronomic traits in wheat. *Aust. J. Agric. Res.* **2008**, *59*, 891–905.
32. Snape, J.W.; Foulkes, M.J.; Simmonds, J.; Leverington, M.; Fish, L.J.; Wang, Y.; Ciavarrella, M. Dissecting gene × environmental effects on wheat yields via QTL and physiological analysis. *Euphytica* **2007**, *154*, 401–408.
33. Kumar, S.; Sehgal, S.K.; Kumar, U.; Prasad, P.V.V.; Joshi, A.K.; Gill, B.S. Genomic characterization of drought tolerance-related traits in spring wheat. *Euphytica* **2012**, *186*, 265–276.
34. Elshafei, A.A.; Saleh, M.S.; Al-Doss, A.A.; Moustafa, K.A.; Al-Qurainy, F.H.; Barakat, M.N. Identification of new SRAP markers linked to leaf chlorophyll content, flag leaf senescence and cell membrane stability traits in wheat under water-stress condition. *Aust. J. Crop Sci.* **2013**, *7*, 887–893.
35. Yang, D.; Li, M.; Liu, Y.; Chang, L.; Cheng, H.; Chen, J.; Chai, S. Identification of Quantitative Trait Loci and Water Environmental Interactions for Developmental Behaviors of Leaf Greenness in Wheat. *Front. Plant Sci.* **2016**, *7*, 273.
36. Ciucă, M.; Petcu, E. SSR markers associated with membrane stability in wheat (*Triticum aestivum* L.). *Rom. Agric. Res.* **2009**, *26*, 21–24.
37. Quarrie, S.A.; Gulli, M.; Calestani, C.; Steed, A.; Marmiroli, N. Localization of drought-induced abscisic acid production on the long arm of chromosome 5 A of wheat. *Theor. Appl. Genet.* **1994**, *89*, 794–800.
38. Barakat, M.N.; Saleh, M.S.; Al-Doss, A.A.; Moustafa, K.A.; Elshafei, A.A.; Zakri, A.M.; Al-Qurainy, F.H. Mapping of QTLs associated with abscisic acid and water stress in wheat. *Biol. Plant.* **2015**, *59*, 291–297.
39. Edae, E.A.; Byrne, P.F.; Haley, S.D.; Lopes, M.S.; Reynolds, M.P. Genome-wide association mapping of yield and yield components of spring wheat under contrasting moisture regimes. *Theor. Appl. Genet.* **2014**, *127*, 791–807.
40. Ain, Q.; Rasheed, A.; Anwar, A.; Mahmood, T.; Imtiaz, M.; Mahmood, T.; Xia, X.; He, Z.; Quraishi, U.M. Genome-wide association for grain yield under rainfed conditions in historical wheat cultivars from Pakistan. *Front. Plant Sci.* **2015**, *6*, 743.
41. Ahmad, M.Q.; Khan, S.H.; Khan, A.S.; Kazi, A.M.; Basra, S.M.A. Identification of QTLs for drought tolerance traits on wheat chromosome 2A using association mapping. *Int. J. Agric. Biol.* **2014**, *16*, 862–870.
42. Zhang, K.; Wang, J.; Zhang, L.; Rong, C.; Zhao, F.; Peng, T.; Li, H.; Cheng, D.; Liu, X.; Qin, H.; et al. Association analysis of genomic loci important for grain weight control in elite common wheat varieties cultivated with variable water and fertiliser supply. *PLoS ONE* **2013**, *8*, e57853.
43. Edae, E.A.; Byrne, P.F.; Manmathan, H.; Haley, S.D.; Moragues, M.; Lopes, M.S.; Reynolds, M.P. Association Mapping and Nucleotide Sequence Variation in Five Drought Tolerance Candidate Genes in Spring Wheat. *Plant Gen.* **2013**, *6*, 547–562.
44. Gahlaut, V. Genetic Dissection of Water Stress Tolerance in Bread Wheat. Ph.D. Thesis, Chaudhary Charan Singh University, Meerut, India, 2016.

© 2017 by the authors. Submitted for possible open access publication under the terms and conditions of the Creative Commons Attribution (CC-BY) license (<http://creativecommons.org/licenses/by/4.0/>).
